# Supplementary material for: Functional Metagenomics Unveils a Multifunctional Glycosyl Hydrolase from the Family 43 Catalysing the Breakdown of Plant Polymers in the Calf Rumen
Source: PubMed Central journal article supplement (PMC3382598; doi:10.1371/journal.pone.0038134), 2012-06-25

Figure S1 Physical maps of the r\_01, r\_02, r\_03, r\_05, r\_06, r\_07, r\_09 fosmid/plasmids from the R library.

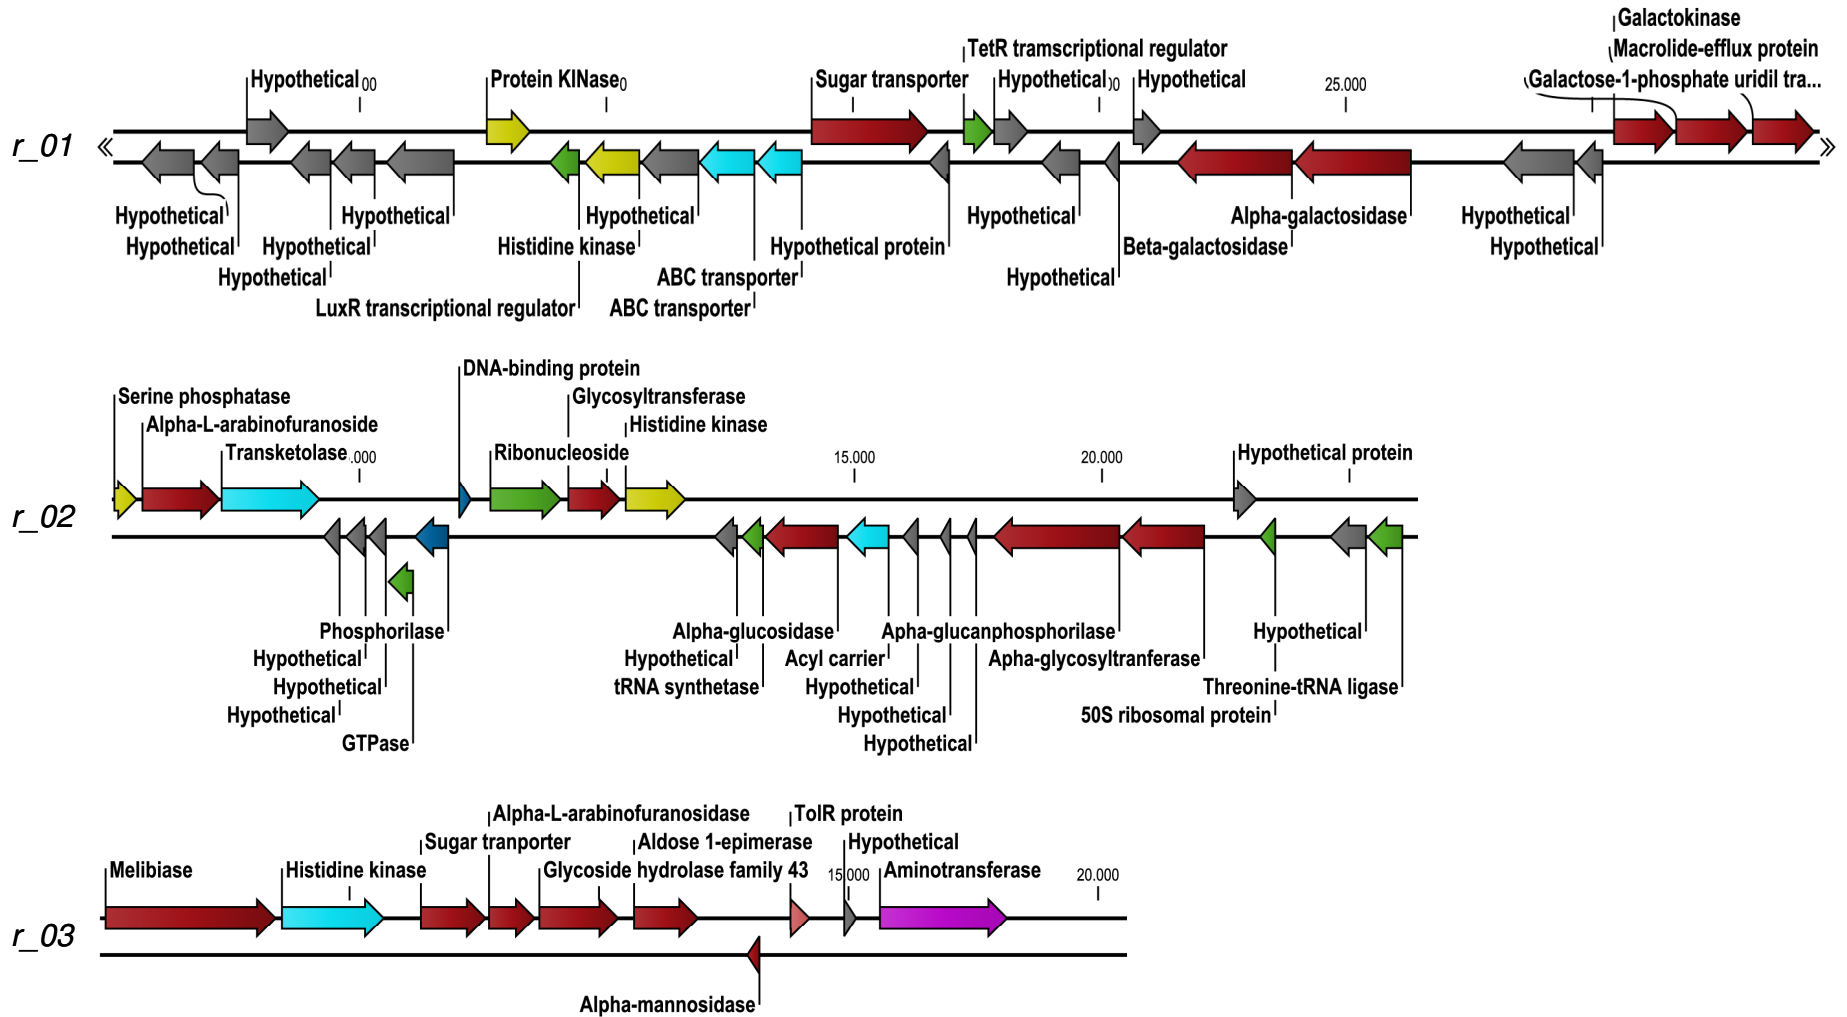

(B) Plasmids r\_05, r\_06, r\_07 and r\_09

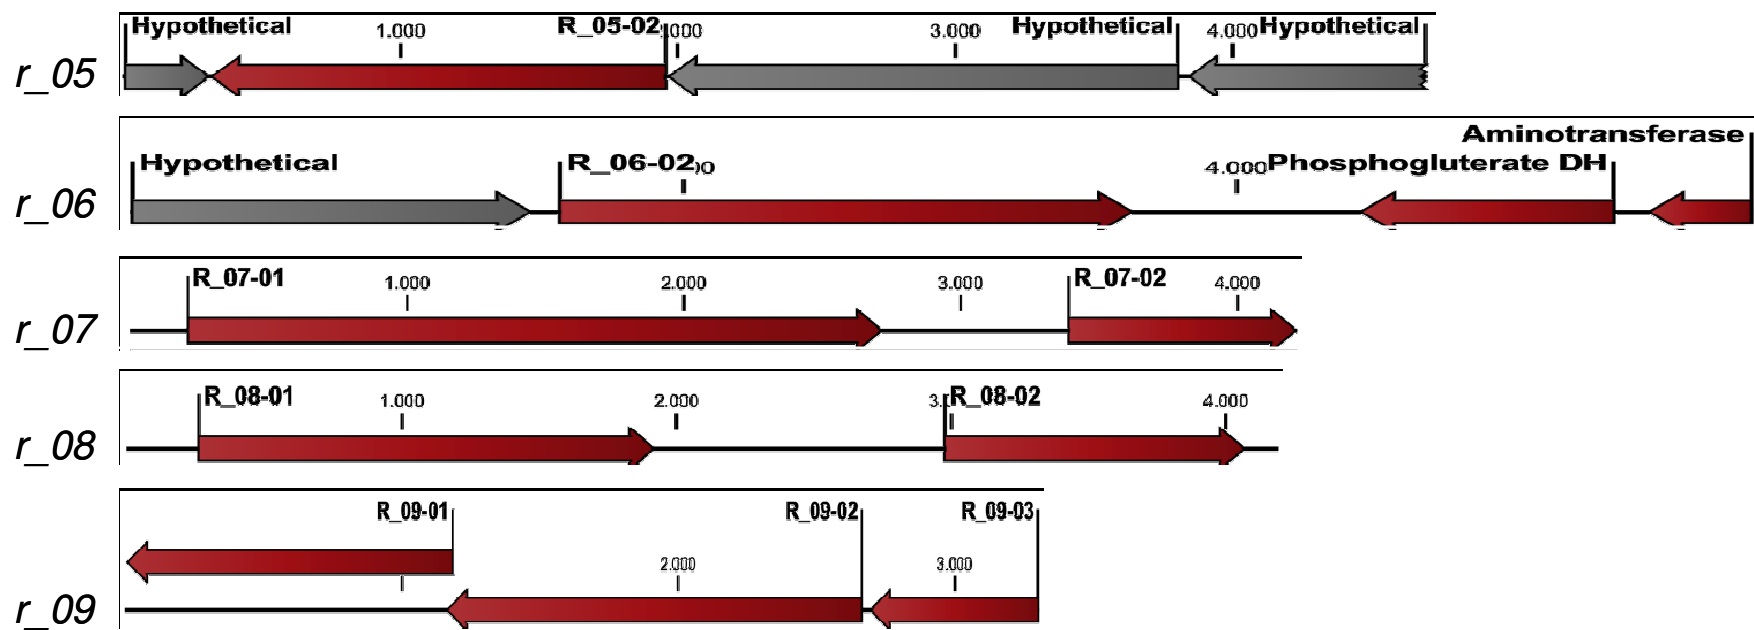

Supplement: pone.0038134.s001.pdf [file pone.0038134.s001.pdf]
