# Supplementary material for: Functional Metagenomics Unveils a Multifunctional Glycosyl Hydrolase from the Family 43 Catalysing the Breakdown of Plant Polymers in the Calf Rumen
Source: PubMed Central journal article supplement (PMC3382598; doi:10.1371/journal.pone.0038134), 2012-06-25

**Figure S3 pH optima for the hydrolases recovered from the R library.** The enzyme activity was determined as described in the Supporting Materials and Methods using the best substrate and temperature (see the details in **Table S5**) and the enzyme at a concentration of 12 nM.

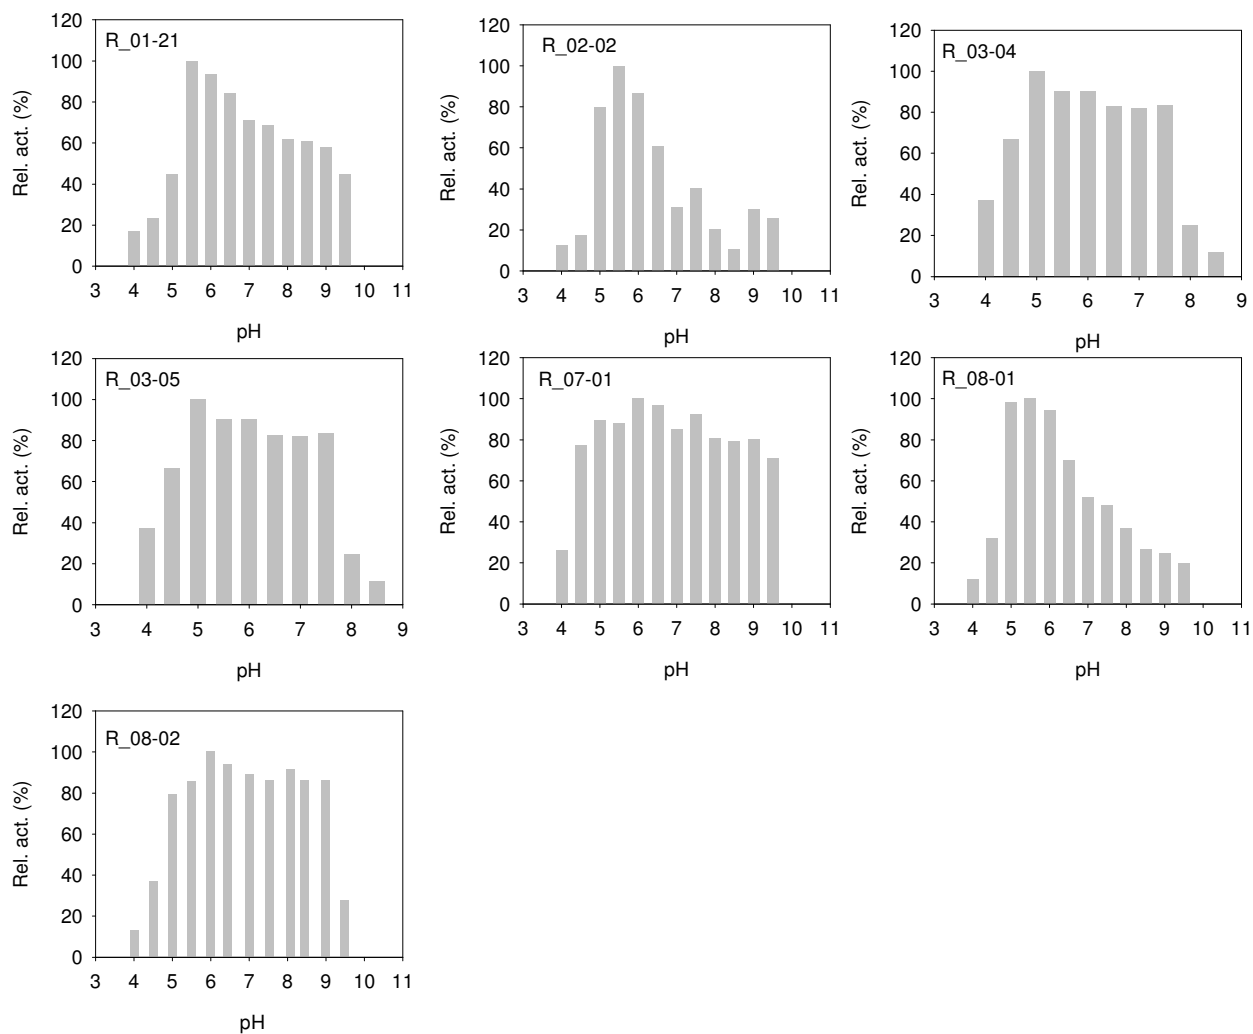

Supplement: pone.0038134.s003.pdf [file pone.0038134.s003.pdf]
