# Supplementary material for: Functional Metagenomics Unveils a Multifunctional Glycosyl Hydrolase from the Family 43 Catalysing the Breakdown of Plant Polymers in the Calf Rumen
Source: PubMed Central journal article supplement (PMC3382598; doi:10.1371/journal.pone.0038134), 2012-06-25

**Figure S5 Overall 3-D modelling of the structure of the hydrolases from the R library.** The residues belonging to the catalytic core and regions that are suggested to have functional and structural roles are indicated. The following proteins were used as the templates for the homology modelling:  $\beta$ -galactosidase from *Bacteroides vulgatus* (PDB 3gm8) for R\_01-20;  $\alpha$ -galactosidase from *Lactobacillus brevis* (PDB 3mi6) for R\_01-21; *Klebsiella* sp. isomaltulose synthase and related enzymes (PDB 1wzl, 1wza and 1m53) for R\_02-15;  $\alpha$ -arabinofuranosidase from *Bacillus subtilis* (PDB 3c7g) for R\_03-04, R\_03-05 and R09-02; and  $\alpha$ -rhamnosidase from *Bacteroides thetaiotaomicron* (PDB 3cih) for R\_07-01 and R\_08-01.

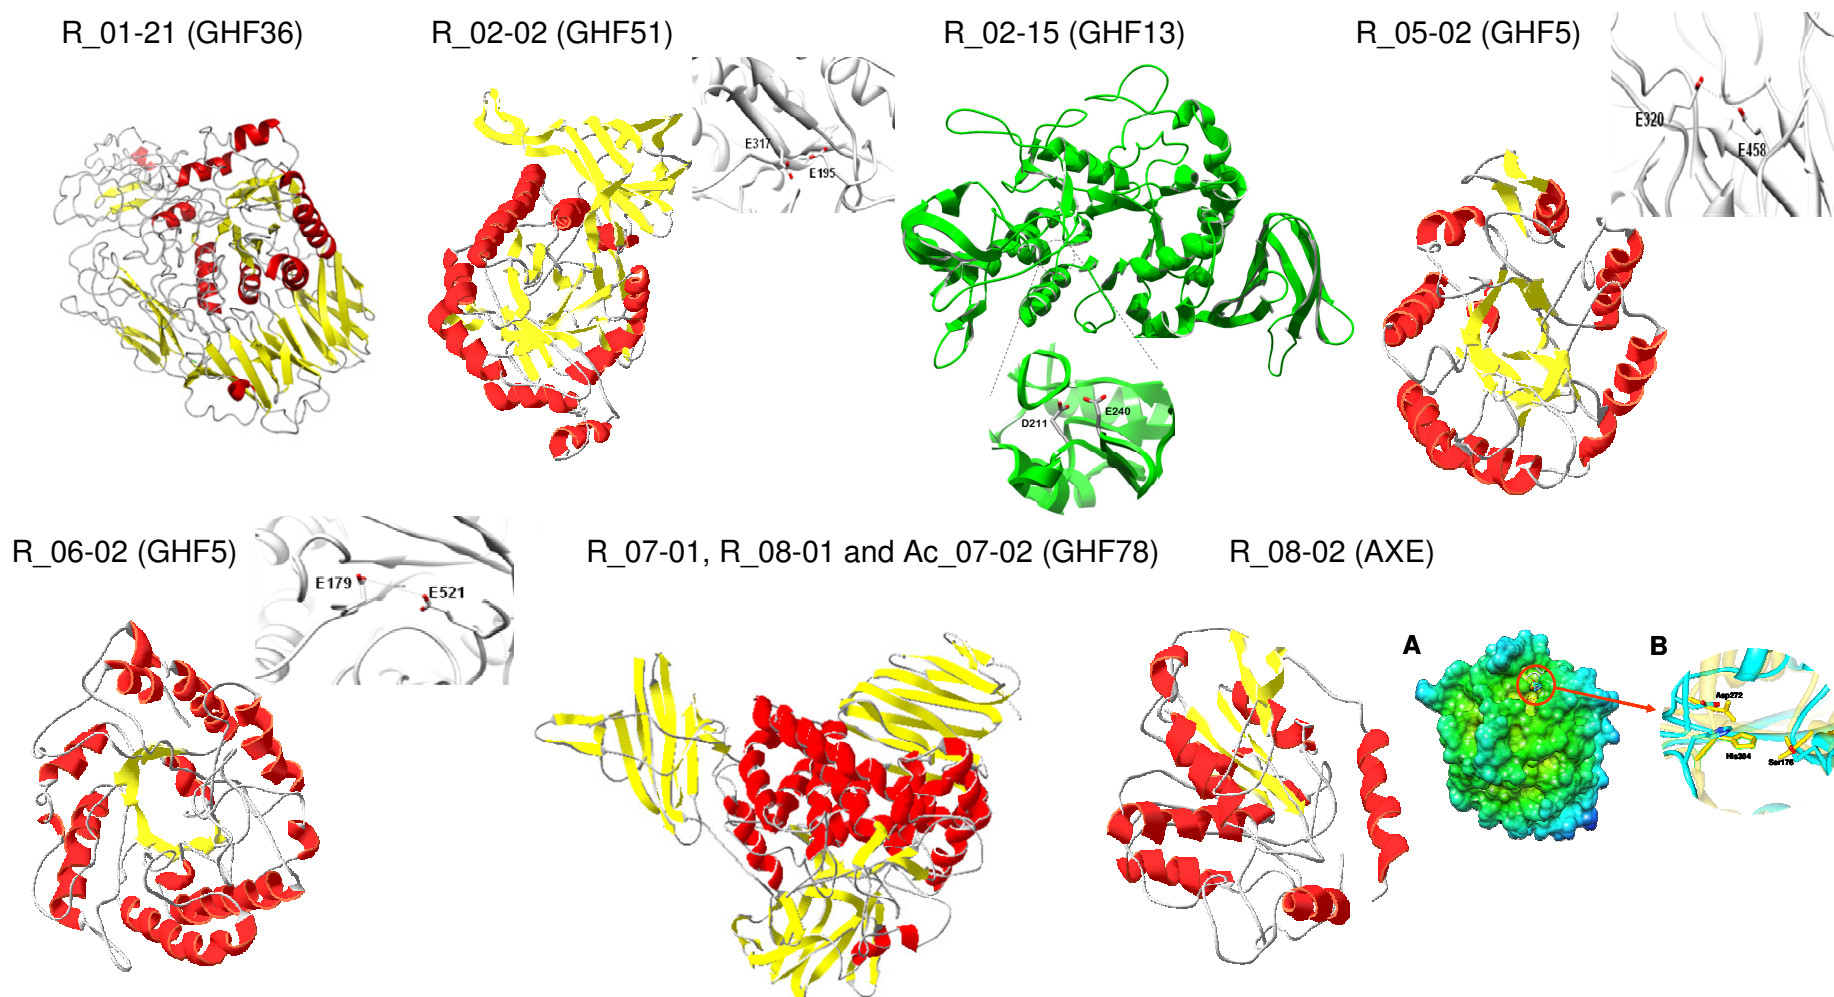

Supplement: pone.0038134.s005.pdf [file pone.0038134.s005.pdf]
