# Supplementary material for: Functional Metagenomics Unveils a Multifunctional Glycosyl Hydrolase from the Family 43 Catalysing the Breakdown of Plant Polymers in the Calf Rumen
Source: PubMed Central journal article supplement (PMC3382598; doi:10.1371/journal.pone.0038134), 2012-06-25

**Figure S7 Dendrogram of the compositional sequence similarities, as calculated by the comparison of the frequencies of tetranucleotides in the sequenced DNA fragments, of the r\_02 fosmid and bacterial chromosomes.**

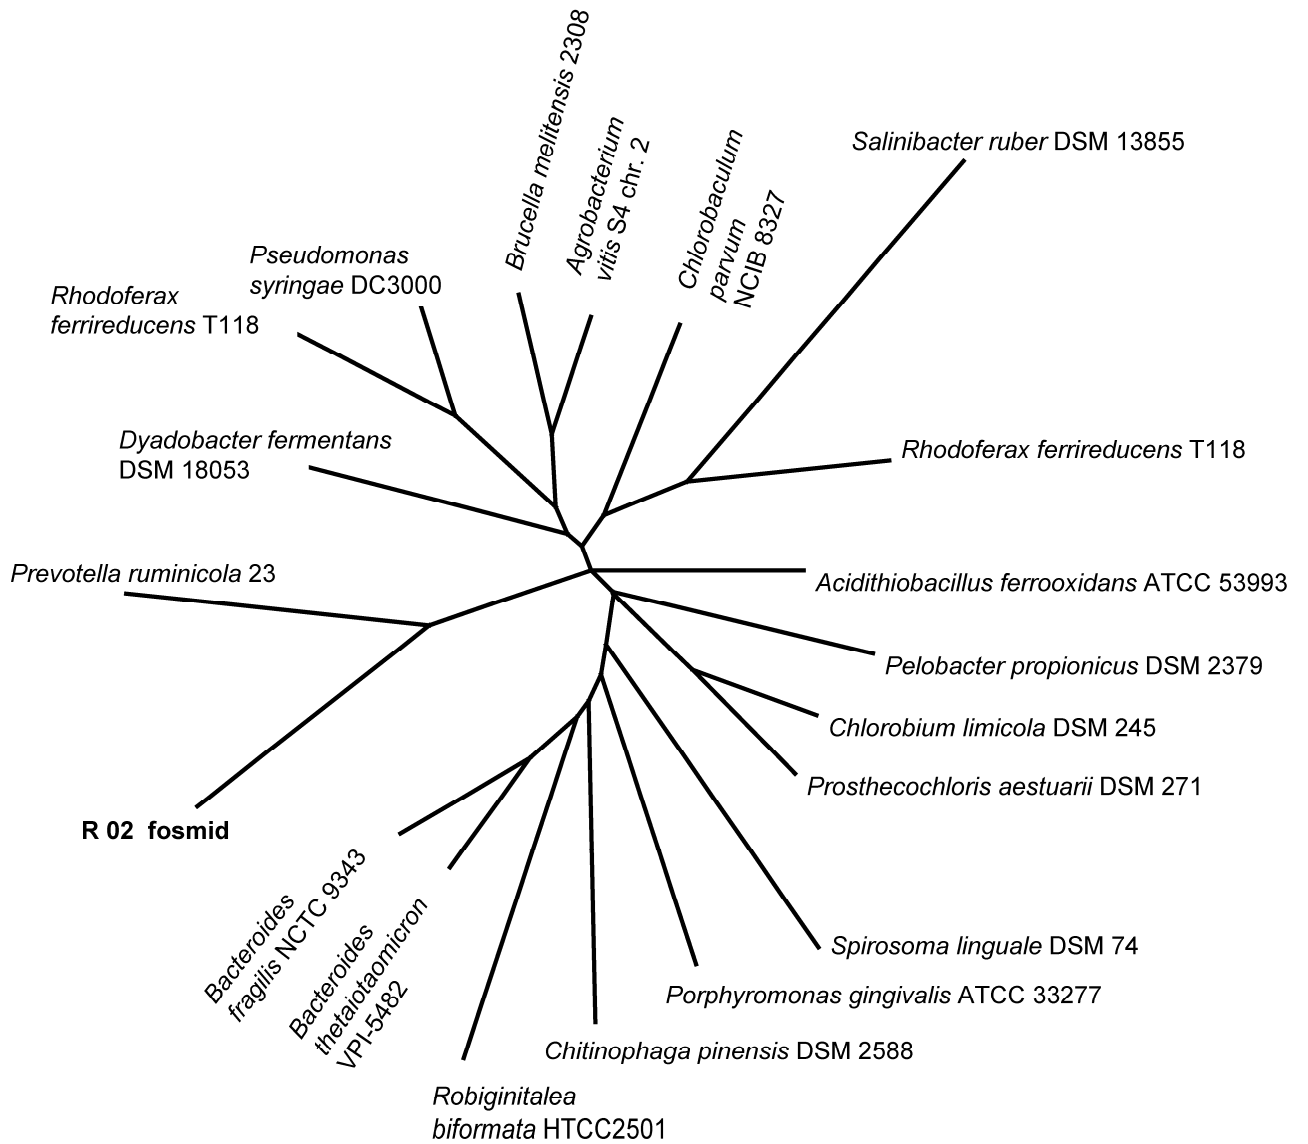

Supplement: pone.0038134.s007.pdf [file pone.0038134.s007.pdf]
