# Supplementary material for: Functional Metagenomics Unveils a Multifunctional Glycosyl Hydrolase from the Family 43 Catalysing the Breakdown of Plant Polymers in the Calf Rumen
Source: PubMed Central journal article supplement (PMC3382598; doi:10.1371/journal.pone.0038134), 2012-06-25

**Figure S8** General structures of the activated and non-activated oligosaccharide substrates for R\_09-02. The arrow indicates the putative cleavage site.

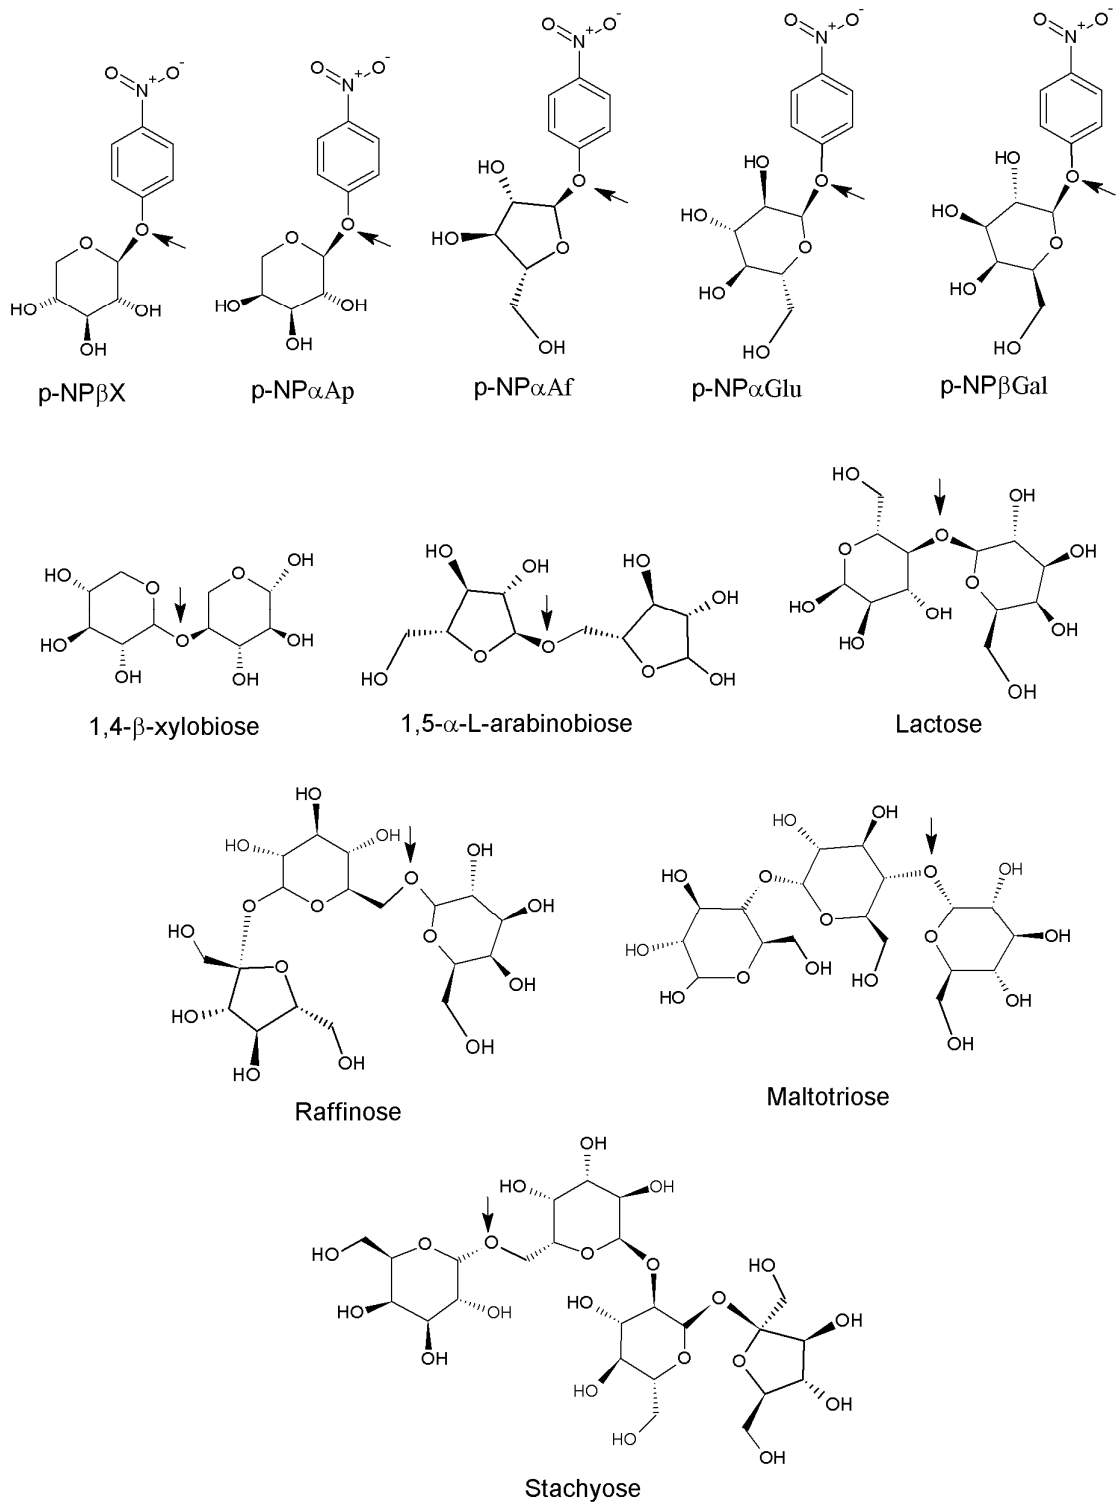

Supplement: pone.0038134.s008.pdf [file pone.0038134.s008.pdf]
