# Supplementary material for: Functional Metagenomics Unveils a Multifunctional Glycosyl Hydrolase from the Family 43 Catalysing the Breakdown of Plant Polymers in the Calf Rumen
Source: PubMed Central journal article supplement (PMC3382598; doi:10.1371/journal.pone.0038134), 2012-06-25
Supplement: pone.0038134.s009.pdf [file pone.0038134.s009.pdf]

**Table S1 Summary of the characteristics of selected fosmid/plasmid clones from the bovine rumen (R) metagenome library that contain genes encoding glycosyl hydrolases.**

| <b>Fosmid/ plasmid designation</b> | <b>Source</b> | <b>Screened substrate</b> | <b>Vector</b> | <b>Size (bp)</b> | <b>G+C average (%)</b> | <b>N° ORFs</b> | <b>N° GH</b> |
|------------------------------------|---------------|---------------------------|---------------|------------------|------------------------|----------------|--------------|
| r_01                               | Cow rumen     | pNP $\alpha$ Gal          | pCC1FOS       | 34609            | 53,78                  | 27             | 2            |
| r_02                               | Cow rumen     | pNP $\alpha$ Af           | pCC1FOS       | 26383            | 50,89                  | 25             | 2            |
| r_03                               | Cow rumen     | pNP $\alpha$ Af           | pCC1FOS       | 19873            | 62,86                  | 10             | 2            |
| r_05                               | Cow rumen     | CMC                       | pUC19         | 4638             | 51,53                  | 4              | 1            |
| r_06                               | Cow rumen     | CMC                       | pUC19         | 5805             | 44,60                  | 4              | 1            |
| r_07                               | Cow rumen     | pNP $\alpha$ R            | pUC19         | 4176             | 63,27                  | 2              | 2            |
| r_08                               | Cow rumen     | pNP $\alpha$ R            | pUC19         | 4145             | 63,86                  | 2              | 1            |
| r_09                               | Cow rumen     | pNP $\alpha$ Af           | pUC19         | 3264             | 60,69                  | 3              | 3            |
