# Supplementary material for: Functional Metagenomics Unveils a Multifunctional Glycosyl Hydrolase from the Family 43 Catalysing the Breakdown of Plant Polymers in the Calf Rumen
Source: PubMed Central journal article supplement (PMC3382598; doi:10.1371/journal.pone.0038134), 2012-06-25
Supplement: pone.0038134.s010.pdf [file pone.0038134.s010.pdf]

**Table S2 Annotation of the genes predicted in the fosmid/plasmid clones from the bovine rumen (R) metagenome library. (A) Fosmid r\_01, (B) fosmid r\_02, (C) fosmid r\_03, (D) plasmid r\_05, (E) plasmid r\_06, (F) plasmid r\_07, (G) plasmid r\_08 and (H) plasmid r\_09.** Selected fosmids were sequenced by shotgun sequencing, and the sorted ORFs were annotated by homology using the BLAST alignment tool. The theoretical molecular weight (MW) and isoelectric point (pI) were calculated for each gene product using the ExPASy ProtParam online tool.

**(A) Fosmid r\_01**

| Gene name | Strand | Left End     | Right End    | Length (AA) | Gene product name                         | MW (Da)*        | pI*         | Organism (best hit)                      | Expected Value (E), Identities (I), Positives (P) | Top homolog          |
|-----------|--------|--------------|--------------|-------------|-------------------------------------------|-----------------|-------------|------------------------------------------|---------------------------------------------------|----------------------|
| r_01_01   | -      | 554          | 1651         | 365         | Hypothetical protein                      | 41519.62        | 6.55        | <i>Coprococcus sp.</i>                   | E=4e-44; I=118/389 (30%); P=188/389 (48%)         | CBK83438.1           |
| r_01_02   | -      | 1756         | 2556         | 266         | Hypothetical protein                      | 29042.66        | 4.26        | <i>Eubacterium hallii</i>                | E=2e-38; I=83/213 (38%); P=122/213 (57%)          | ZP_03717785.1        |
| r_01_03   | +      | 2691         | 3578         | 295         | Hypothetical protein                      | 32939.75        | 4.2         | <i>Desulfovibrio piger</i>               | E=4e-72; I=143/294 (48%); P=186/294 (63%)         | ZP_03311848.1        |
| r_01_04   | -      | 3575         | 4423         | 282         | Hypothetical protein                      | 32109.03        | 5.88        | <i>Eubacterium yurii</i>                 | E=0.007; I=17/43 (40%); P=28/43 (66%)             | ZP_07454699.1        |
| r_01_05   | -      | 4434         | 5318         | 294         | Hypothetical protein                      | 33207.73        | 5.4         | <i>Eubacterium siraeum</i>               | E=0.002; I=19/43 (44%); P=25/43 (58%)             | CBK97501.1           |
| r_01_06   | -      | 5521         | 6924         | 467         | Hypothetical protein                      | 50863.10        | 9.01        | <i>Shuttleworthia satelles</i>           | E=3e-103; I=201/463 (43%); P=298/463 (64%)        | ZP_04454784.1        |
| r_01_07   | +      | 7555         | 8472         | 305         | Pprotein KINase family                    | 34487.97        | 4.78        | <i>Myxobacter sp.</i>                    | E=9e-13; I=71/240 (29%); P=110/240 (45%)          | AAx82624.1           |
| r_01_08   | -      | 8835         | 9464         | 209         | LuxR transcriptional regulator            | 23070.64        | 4.52        | <i>Ruminococcus obeum</i>                | E=1e-59; I=114/205(55%); P=154/205 (75%)          | ZP_01964629.1        |
| r_01_09   | -      | 9551         | 10687        | 378         | Histidine kinase                          | 41561.16        | 6.48        | <i>Ruminococcus albus</i>                | E=2e-47; I=96/225 (42%); P=145/225 (64%)          | ZP_06717737.1        |
| r_01_10   | -      | 10700        | 11884        | 394         | Hypothetical protein                      | 43208.82        | 5.21        | <i>Dorea longicatena</i>                 | E=2e-29; I=119/401 (29%); P=196/401 (48%)         | ZP_01995410.1        |
| r_01_11   | -      | 11871        | 13019        | 382         | ABC-2 type transporter                    | 42561.68        | 4.75        | <i>Ruminococcus albus 7</i>              | E=3e-36; I=105/382 (28%); P=189/382 (50%)         | ZP_07383825.1        |
| r_01_12   | -      | 13041        | 13982        | 313         | ABC transporter related                   | 34795.30        | 5.71        | <i>Ruminococcus albus 7</i>              | E=7e-115; I=205/310 (67%); P=245/310 (80%)        | ZP_07383824.1        |
| r_01_13   | +      | 14147        | 16546        | 799         | Sugar transporter                         | 89500.04        | 4.02        | <i>Bacillus mycoides</i>                 | E=2e-16; I=111/449 (24%); P=198/449 (44%)         | ZP_04160063.1        |
| r_01_14   | -      | 16527        | 16970        | 147         | Hypothetical protein                      | 16164.02        | 9.36        | <i>Nostoc punctiforme</i>                | E=0.84; I=19/58 (32%); P=31/58 (53%)              | YP_001867131.1       |
| r_01_15   | +      | 17233        | 17850        | 205         | TetR transcriptional regulator            | 24154.64        | 5.82        | <i>Clostridium hylemonae</i>             | E=7e-46; I=91/204 (44%); P=137/204 (67%)          | ZP_03777844.1        |
| r_01_16   | +      | 17850        | 18569        | 239         | Hypothetical protein                      | 27040.49        | 9.45        | <i>Clostridium hylemonae</i>             | E=7e-85; I=145/237 (61%); P=182/237 (76%)         | ZP_03778041.1        |
| r_01_17   | -      | 18808        | 19617        | 269         | Hypothetical protein                      | 31513.88        | 8.71        | <i>Butyrivibrio fibrisolvens</i>         | E=0.038; I=29/106 (27%); P=53/106 (50%)           | CBK73816.1           |
| r_01_18   | -      | 20087        | 20416        | 109         | Hypothetical protein                      | 12288.62        | 8.05        | <i>Toxoplasma gondii</i>                 | E=3.7; I=22/66 (33%); P=36/66 (54%)               | EEE34841.1           |
| r_01_19   | +      | 20677        | 21270        | 197         | Hypothetical protein                      | 20864.44        | 4.85        | <i>Listeria welshimeri</i>               | E=0.46; I=35/154 (22%); P=65/154 (42%)            | YP_849623.1          |
| r_01_20   | -      | <b>21563</b> | <b>23923</b> | <b>786</b>  | <b>beta-Galactosidase (GHF2)</b>          | <b>87991.29</b> | <b>5.17</b> | <b>Roseburia inulinivorans</b>           | <b>E=0.0; I=441/777 (56%); P=541/777 (69%)</b>    | <b>ZP_03752805.1</b> |
| r_01_21   | -      | <b>23943</b> | <b>26339</b> | <b>798</b>  | <b>alpha-Galactosidase (GHF36)</b>        | <b>90107.58</b> | <b>5.71</b> | <b>Roseburia inulinivorans</b>           | <b>E=0.0; I=482/807 (59%); P=603/807 (74%)</b>    | <b>ZP_03752801.1</b> |
| r_01_22   | -      | 26345        | 28159        | 604         | Sugar transporter                         | 65605.7         | 5.14        | <i>Clostridium lentocvellum</i> DSM 5427 | E=1e-86; I=172/299 (58%); P=220/299 (74%)         | ZP_06885281.1        |
| r_01_23   | -      | 28175        | 29641        | 488         | Hypothetical protein                      | 54586.33        | 6.94        | <i>Roseburia intestinales</i> L1-82      | E=0.0; I=361/488 (73%); P=411/488 (84%)           | ZP_04742652.2        |
| r_01_24   | -      | 29658        | 30224        | 188         | Hypothetical protein                      | 22227.74        | 5.83        | <i>Roseburia inulinivorans</i>           | E=1e-51; I=99/183 (54%); P=133/183 (72%)          | ZP_03752806.1        |
| r_01_25   | +      | 30423        | 31670        | 415         | Galactokinase                             | 44143.84        | 4.93        | <i>Clostridium sp.</i>                   | E=7e-139; I=240/405 (59%); P=307/405 (75%)        | ZP_02073770.1        |
| r_01_26   | +      | 31682        | 33166        | 494         | Galactose-1-phosphate uridylyltransferase | 55737.38        | 5.4         | <i>Clostridium sp.</i>                   | E=0.0; I=315/498 (63%); P=372/498 (74%)           | ZP_02073769.1        |
| r_01_27   | +      | 33237        | 34520        | 427         | Sugar transporter                         | 45007.41        | 9.13        | <i>Oribacterium sp</i>                   | E=3e-117; I=215/423 (50%); P=298/423 (70%)        | ZP_06598814.1        |

\*The theoretical molecular weight (MW) and isoelectric point (pI) were calculated for the gene product using ExPASy ProtParam online tool

Table S2 (B) Fosmid *r\_02*

| Gene name      | Strand | Left End     | Right End    | Length (AA) | Gene product name                                | MW (Da)         | pI          | Organism (best hit)                | Expected Value (E). Identities (I). Positives (P) | Top homolog           |
|----------------|--------|--------------|--------------|-------------|--------------------------------------------------|-----------------|-------------|------------------------------------|---------------------------------------------------|-----------------------|
| <i>r_02-01</i> | +      | 31           | 516          | 161         | Serine phosphatase                               | 17971.32        | 4.54        | <i>Prevotella ruminicola</i>       | E=3e-47; I=90/152 (59%); P=113/152 (74%)          | YP_003576084.1        |
| <i>r_02-02</i> | +      | <b>599</b>   | <b>2191</b>  | <b>530</b>  | <b>alpha-L-arabinofuranosidase (GHF51)</b>       | <b>59485.56</b> | <b>6.25</b> | <i>Prevotella ruminicola</i>       | <b>E=0.0; I=458/530 (86%); P=490/530 (92%)</b>    | <b>YP_003573794.1</b> |
| <i>r_02-03</i> | +      | 2199         | 4211         | 670         | Transketolase                                    | 73006.93        | 5.31        | <i>Prevotella ruminicola</i>       | E=0.0; I=634/664 (95%); P=649/664 (97%)           | YP_003573769.1        |
| <i>r_02-04</i> | -      | 4259         | 4618         | 119         | Hypothetical protein                             | 12711.51        | 4.71        | <i>Anaerococcus vaginalis</i>      | E=0.052; I=23/79 (29%); P=37/79 (46%)             | ZP_05471839.1         |
| <i>r_02-05</i> | -      | 4703         | 5143         | 146         | Hypothetical protein                             | 16867.94        | 9.07        | <i>Prevotella sp</i>               | E=0.002; I= 33/130 (25%); P= 61/130 (46%)         | ZP_06406453.1         |
| <i>r_02-06</i> | -      | 5167         | 5550         | 127         | Hypothetical protein                             | 15298.50        | 4.37        | <i>Bacteroides plebeius</i>        | E=7e-47; I=84/124 (67%); P=103/124 (83%)          | ZP_03208046.1         |
| <i>r_02-07</i> | -      | 5570         | 6103         | 177         | tRNA modification GTPase                         | 20051.82        | 4.49        | <i>Prevotella ruminicola</i>       | E= 5e-48; I= 94/173 (54%); P= 132/173 (76%)       | YP_003575005.1        |
| <i>r_02-08</i> | -      | 6100         | 6813         | 237         | Purine nucleoside phosphorylase                  | 25718.42        | 5.45        | <i>Epulopiscium sp.</i>            | E=4e-89; I=157/232 (67%); P=186/232 (80%)         | ZP_02693126.1         |
| <i>r_02-09</i> | +      | 6998         | 7273         | 91          | DNA-binding protein HU                           | 10088.72        | 9.65        | <i>Prevotella melaninogenica</i>   | E=4e-31; I=67/91 (73%); P=76/91 (83%)             | YP_003574043.1        |
| <i>r_02-10</i> | +      | 7627         | 9087         | 486         | Ribonuclease G                                   | 55414.48        | 9.28        | <i>Prevotella ruminicola</i>       | E=0.0; I=432/480 (90%); P=458/480 (95%)           | YP_003574042.1        |
| <i>r_02-11</i> | +      | 9203         | 10285        | 360         | Glycosyltransferase                              | 41162.42        | 8.23        | <i>Prevotella ruminicola</i>       | E= 3e-169; I= 276/360 (76%); P= 320/360 (88%)     | YP_003574041.1        |
| <i>r_02-12</i> | +      | 10360        | 11607        | 415         | Histidine kinase                                 | 47176.97        | 5.21        | <i>Prevotella ruminicola</i>       | E= 4e-172; I= 291/409 (71%); P= 346/409 (84%)     | YP_003574040.1        |
| <i>r_02-13</i> | -      | 12157        | 12645        | 162         | Hypothetical protein                             | 16987.36        | 4.44        | <i>Anopheles gambiae</i> str. PEST | E=0.18; I= 17/46 (37%); P= 29/46 (64%)            | XP_317568.3           |
| <i>r_02-14</i> | -      | 12705        | 13172        | 155         | Alanyl-tRNA synthetase                           | 18340.74        | 5.31        | <i>Prevotella ruminicola</i>       | E=8e-69; I=126/152 (82%); P=144/152 (94%)         | YP_003574038.1        |
| <i>r_02-15</i> | -      | <b>13177</b> | <b>14682</b> | <b>501</b>  | <b>alpha-Glucosidase (alpha-amylase) (GHF13)</b> | <b>56950.34</b> | <b>5.53</b> | <i>Prevotella ruminicola</i>       | <b>E=0.0; I= 398/501 (79%); P= 436/501 (87%)</b>  | <b>YP_003574036.1</b> |
| <i>r_02-16</i> | -      | 14819        | 15709        | 296         | Malonyl CoA-acyl carrier protein                 | 31591.42        | 5.04        | <i>Prevotella ruminicola</i>       | E=2e-164; I=283/296 (95%); P=289/296 (97%)        | YP_003574035.1        |
| <i>r_02-17</i> | -      | 15959        | 16300        | 113         | Hypothetical protein                             | 12599.67        | 8.51        | <i>Trichoplax adhaerens</i>        | E=0.45; I=22/57 (38%); P=32/57 (56%)              | XP_002109933.1        |
| <i>r_02-18</i> | -      | 16713        | 16955        | 80          | Hypothetical protein                             | 8357.08         | 4.6         | <i>Ostreococcus tauri</i>          | E=0.042; I=26/80 (33%); P=40/80 (50%)             | XP_003074850.1        |
| <i>r_02-19</i> | -      | 17262        | 17477        | 71          | Hypothetical protein                             | 7465.39         | 4.87        | <i>Phaeodactylum tricorutum</i>    | E=7.5; I=16/37 (43%); P=21/37 (56%)               | XP_002177766.1        |
| <i>r_02-20</i> | -      | 17792        | 20368        | 858         | alpha-Glucan phosphorylase                       | 99019.84        | 6           | <i>Prevotella ruminicola</i>       | E=0.0; I=766/856 (89%); P=819/856 (95%)           | YP_003574031.1        |
| <i>r_02-21</i> | -      | 20391        | 22082        | 563         | alpha-Glycosyltransferase                        | 64617.55        | 5.55        | <i>Prevotella ruminicola</i>       | E=0.0; I=466/576 (80%); P=503/576 (87%)           | YP_003574030.1        |
| <i>r_02-22</i> | +      | 22645        | 23139        | 164         | Hypothetical protein                             | 17633.17        | 8.14        | <i>Prevotella ruminicola</i>       | E=3e-77; I=140/157 (89%); P=152/157 (96%)         | YP_003575276.1        |
| <i>r_02-23</i> | -      | 23174        | 23518        | 114         | 50S ribosomal protein L20                        | 13155.52        | 11.25       | <i>Prevotella ruminicola</i>       | E=4e-57; I=111/114 (97%); P=111/114 (97%)         | YP_003573965.1        |
| <i>r_02-24</i> | -      | 24594        | 25349        | 251         | Hypothetical protein                             | 28037.20        | 6.53        | <i>Branchiostoma floridae</i>      | E=4e-09; I=38/148 (25%); P=71/148 (47%)           | XP_002611623.1        |
| <i>r_02-25</i> | -      | 25357        | 26085        | 242         | Threonine-tRNA ligase                            | 27421.26        | 5.1         | <i>Prevotella ruminicola</i>       | E=5e-138; I=236/242 (97%); P=240/242 (99%)        | YP_003573962.1        |

\*The theoretical molecular weight (MW) and isoelectric point (pI) were calculated for the gene product using ExPASy ProtParam online tool

Table S2 (C) Fosmid *r\_03*

| Gene name      | Strand | Left End | Right End | Length (AA) | Gene product name                           | MW (Da)         | pI          | Organism (best hit)                     | Expected Value (E). Identities (I). Positives (P) | Top homolog           |
|----------------|--------|----------|-----------|-------------|---------------------------------------------|-----------------|-------------|-----------------------------------------|---------------------------------------------------|-----------------------|
| <i>r_03-01</i> | +      | 1        | 3540      | 1148        | Melibiase (CBM51)                           | 119432.86       | 4.48        | <i>Blastopirellula marina</i>           | E=3e-06; I=43/150 (28%); P=77/150 (51%)           | ZP_01089974.1         |
| <i>r_03-02</i> | +      | 3626     | 5707      | 693         | Histidine kinase                            | 74948.66        | 5.96        | <i>Chthononobacter flavus</i>           | E=2e-37; I=160/610 (26%); P=257/610 (42%)         | ZP_03131882.1         |
| <i>r_03-03</i> | +      | 6411     | 7748      | 445         | Sugar transporter                           | 47558.78        | 9.21        | <i>Bacteriodes xylanisolvens</i>        | E=2e-147; I=267/486 (54%); P=335/486 (68%)        | CBK69517.1            |
| <i>r_03-04</i> | +      | 7778     | 8731      | 317         | <b>beta-Xylosidase (GHF43)</b>              | <b>35572.72</b> | <b>5.08</b> | <b><i>Bacteroides intestinalis</i></b>  | <b>E=2e-102; I=184/316 (58%); P=228/316 (72%)</b> | <b>YP_001297392.1</b> |
| <i>r_03-05</i> | +      | 8786     | 10405     | 539         | <b>alpha-L-Arabino-furanosidase (GHF43)</b> | <b>59988.12</b> | <b>7.20</b> | <b><i>Bacteroides xylanisolvens</i></b> | <b>E=7e-170; I=288/527 (54%); P=378/527 (71%)</b> | <b>ZP_06769240.1</b>  |
| <i>r_03-06</i> | +      | 10683    | 12005     | 440         | Aldose 1-epimerase                          | 48897.69        | 9.46        | <i>Opitutus terrae</i>                  | E=8e-96; I=172/357 (48%); P=228/357 (63%)         | YP_001818271.1        |
| <i>r_03-07</i> | -      | 12951    | 13232     | 93          | Hypothetical protein                        | 10227.92        | 11.45       | <i>Arabidopsis lyrata</i>               | E=6.0; I=20/58 (50%); P=29/58 (50%)               | XP_002870203.1        |
| <i>r_03-08</i> | +      | 13817    | 14239     | 140         | TolR protein                                | 15875.55        | 9.13        | <i>Francisella tularensis</i>           | E=2e-16; I=44/145 (30%); P=85/145 (58%)           | YP_169843.1           |
| <i>r_03-09</i> | +      | 14894    | 15172     | 92          | Hypothetical protein                        | 10218.49        | 11.66       | <i>Rubrobacter xylanophilus</i>         | E=7.3; I=21/49 (42%); P=26/49 (53%)               | YP_643483.1           |
| <i>r_03-10</i> | +      | 15612    | 18197     | 861         | Aminotransferase                            | 95115.21        | 11.55       | <i>Desulfovibrio salexigens</i>         | E=3e-87; I=172/369 (46%); P=235/369 (63%)         | YP_002993204.1        |

\*The theoretical molecular weight (MW) and isoelectric point (pI) were calculated for the gene product using ExPASy ProtParam online tool

**Table S2 (D)** Plasmid *r\_05*

| Gene name      | Strand | Left End | Right End | Length (AA) | Gene product name                  | MW (Da)* | pI   | Organism (best hit)                 | Expected Value (E). Identities (I). Positives (P) | Top homolog    |
|----------------|--------|----------|-----------|-------------|------------------------------------|----------|------|-------------------------------------|---------------------------------------------------|----------------|
| <i>r_05-01</i> | +      | <1       | 312       | 104         | Probable lipoprotein               | 11631.30 | 9.25 | <i>Prevotella ruminicola</i>        | E=3e-23; I=46/97 (47%); P=70/97 (72%)             | YP_003575494.1 |
| <i>r_05-02</i> | -      | 309      | 1949      | 546         | Glycosyl hydrolase family 5 (GHF5) | 61222.36 | 5.31 | Unidentified microorganism          | E=0.0; I=328/518 (63%); P=386/518 (74%)           | CAJ19140.1     |
| <i>r_05-03</i> | -      | 1956     | 3791      | 611         | Hypothetical protein               | 65171.72 | 4.65 | <i>Bacteroides plebeius</i>         | E=3e-48; I=127/360 (35%); P=197/360 (54%)         | ZP_03210084.1  |
| <i>r_05-04</i> | -      | 3831     | >4637     | 267         | Hypothetical protein               | 29364.18 | 4.57 | <i>Bacteroides cellulosilyticus</i> | E=4e-54; I=127/293 (43%); P=168/293 (57%)         | ZP_03678036.1  |

\*The theoretical molecular weight (MW) and isoelectric point (pI) were calculated for the gene product using ExPASy ProtParam online tool

**Table S2 (E)** Plasmid *r\_06*

| Gene name      | Strand | Left End | Right End | Length (AA) | Gene product name                    | MW (Da)*       | pI          | Organism (best hit)                 | Expected Value (E). Identities (I). Positives (P) | Top homolog           |
|----------------|--------|----------|-----------|-------------|--------------------------------------|----------------|-------------|-------------------------------------|---------------------------------------------------|-----------------------|
| <i>r_06-01</i> | +      | <2       | 1456      | 483         | Histidine kinase                     | 55673.40       | 5.33        | <i>Prevotella ruminicola</i>        | E=6e-109; I=221/481 (45%); P=317/481 (65%)        | YP_003575472.1        |
| <i>r_06-02</i> | +      | 1560     | 3632      | 690         | <b>Endo-1,4-beta-xylanase (GHF5)</b> | <b>78164.3</b> | <b>4.87</b> | <b><i>Prevotella ruminicola</i></b> | <b>E=5e-142; I=250/403 (62%); P=294/403 (72%)</b> | <b>YP_003575492.1</b> |
| <i>r_06-03</i> | -      | 4439     | 5368      | 308         | D-Phosphoglycerate dehydrogenase     | 32933.81       | 5.33        | <i>Prevotella ruminicola</i>        | E=2e-151; I=288/305 (94%); P=296/305 (97%)        | YP_003574366.1        |
| <i>r_06-04</i> | -      | >5482    | 5805      | 106         | Phosphoserine transaminase           | 11834.54       | 5.71        | <i>Prevotella ruminicola</i>        | E=3e-57; I=105/109 (96%); P=107/109 (98%)         | YP_003574368.1        |

\*The theoretical molecular weight (MW) and isoelectric point (pI) were calculated for the gene product using ExPASy ProtParam online tool

**Table S2 (F)** Plasmid *r\_07*

| Gene name      | Strand | Left End | Right End | Length (AA) | Gene product name                        | MW (Da)* | pI   | Organism (best hit)             | Expected Value (E). Identities (I). Positives (P) | Top homolog  |
|----------------|--------|----------|-----------|-------------|------------------------------------------|----------|------|---------------------------------|---------------------------------------------------|--------------|
| <i>r_07-01</i> | +      | <2       | 202       | 79          | Putative glycosyl hydrolase (GHF43)      | 8947.0   | 6.46 | <i>Opitutus terrae</i> PB90-1   | E=4e-12; I=34/69 (49%); P=46/69 (67%);            | YP_001818251 |
| <i>r_07-02</i> | +      | 238      | 2721      | 827         | alfa-L-Rhamnosidase (GHF78)              | 94254.9  | 4.93 | <i>Clostridium stercorarium</i> | E=7e-33; I=352/832 (42%); P=496/832 (59%)         | CAB53341.1   |
| <i>r_07-03</i> | +      | 2718     | 3560      | 280         | beta-lactamase domain-containing protein | 31172.3  | 5.41 | <i>Clostridium sp. DL-VIII</i>  | E=7e-42; I=92/279 (33%); P=133/279 (48%);         | ZP_09205102  |
| <i>r_07-04</i> | +      | 3436     | >4176     | 260         | beta-Galactosidase (GHF2)                | 29543.47 | 8.69 | <i>Roseburia intestinalis</i>   | E=0.0; I=87/206 (42%); P=117/206 (56%)            | CBL10828.1   |

\*The theoretical molecular weight (MW) and isoelectric point (pI) were calculated for the gene product using ExPASy ProtParam online tool

**Table S2 (G)** Plasmid *r\_08*

| Gene name      | Strand | Left End | Right End | Length (AA) | Gene product name            | MW (Da)* | pI   | Organism (best hit)               | Expected Value (E). Identities (I). Positives (P) | Top homolog    |
|----------------|--------|----------|-----------|-------------|------------------------------|----------|------|-----------------------------------|---------------------------------------------------|----------------|
| <i>r_08-01</i> | +      | 258      | 3027      | 922         | alpha-L-Rhamnosidase (GHF78) | 61801.6  | 5.62 | <i>Enterococcus casseliflavus</i> | E=1e-112; I=208/487 (42%); P=300/487 (61%)        | ZP_05654693.1  |
| <i>r_08-02</i> | +      | 3033     | 4073      | 346         | alpha/beta Hydrolase         | 40359.5  | 4.95 | <i>Lysinibacillus sphaericus</i>  | E=7e-42; I=117/306 (38%); P=153/306 (50%)         | YP_001698978.1 |

\*The theoretical molecular weight (MW) and isoelectric point (pI) were calculated for the gene product using ExPASy ProtParam online tool

**Table S2 (H)** Plasmid *r\_09*

| Gene name      | Strand | Left End | Right End | Length (AA) | Gene product name                    | MW (Da)* | pI   | Organism (best hit)             | Expected Value (E). Identities (I). Positives (P) | Top homolog   |
|----------------|--------|----------|-----------|-------------|--------------------------------------|----------|------|---------------------------------|---------------------------------------------------|---------------|
| <i>r_09-01</i> | -      | <1       | 1148      | 381         | Glycosyl hydrolase family 43 (GHF43) | 44516.1  | 4.93 | <i>Bryantella formatexigens</i> | E=3e-115; I=204/383 (53%); P=272/383 (71%)        | ZP_05345324.1 |
| <i>r_09-02</i> | -      | 1157     | 2649      | 496         | Xylosidase/arabinosidase (GHF43)     | 54939.62 | 4.96 | <i>Bacteroides capillosus</i>   | E=4e-120; I=233/502 (46%); P=303/502 (60%)        | ZP_02035907.1 |
| <i>r_09-03</i> | -      | 2691     | >3263     | 204         | beta-Galactosidase (GHF1)            | 22244.69 | 4.83 | <i>Ruminococcus sp.</i>         | E=2e-54; I=108/192 (56%); P=131/192 (68%)         | CBL17177.1    |

\*The theoretical molecular weight (MW) and isoelectric point (pI) were calculated for the gene product using ExPASy ProtParam online tool
