# Supplementary material for: Functional Metagenomics Unveils a Multifunctional Glycosyl Hydrolase from the Family 43 Catalysing the Breakdown of Plant Polymers in the Calf Rumen
Source: PubMed Central journal article supplement (PMC3382598; doi:10.1371/journal.pone.0038134), 2012-06-25
Supplement: pone.0038134.s011.pdf [file pone.0038134.s011.pdf]

**Table S3 Summary of the annotation features of the glycosyl- and feruloyl-like coding sequences (CDSs) predicted in the hydrolase-coding DNA fragments from the R library\*.**

| Gene name      | Strand | Left End | Right End | Length (AA) | Predicted product name       | Family | MW (Da)  | pI   | Organism (best hit)               | Expected Value (E), Identities (I), Positives (P) | Top homolog    |
|----------------|--------|----------|-----------|-------------|------------------------------|--------|----------|------|-----------------------------------|---------------------------------------------------|----------------|
| <i>r_01_20</i> | -      | 21563    | 23923     | 786         | beta-Galactosidase           | GHF2   | 87991.29 | 5.17 | <i>Roseburia inulinivorans</i>    | E=0.0; I=441/777 (56%); P=541/777 (69%)           | ZP_03752805.1  |
| <i>r_01_21</i> | -      | 23943    | 26339     | 798         | alpha-Galactosidase          | GHF36  | 90107.58 | 5.71 | <i>Roseburia inulinivorans</i>    | E=0.0; I=482/807 (59%); P=603/807 (74%)           | ZP_03752801.1  |
| <i>r_02_02</i> | +      | 599      | 2191      | 530         | alpha-L-Arabinofuranosidase  | GHF51  | 59485.56 | 6.25 | <i>Prevotella ruminicola</i>      | E=0.0; I=458/530 (86%); P=490/530 (92%)           | YP_003573794.1 |
| <i>r_02_15</i> | -      | 13177    | 14682     | 501         | alpha-Glucosidase            | GHF13  | 56950.34 | 5.53 | <i>Prevotella ruminicola</i>      | E=0.0; I= 398/501 (79%); P= 436/501 (87%)         | YP_003574036.1 |
| <i>r_03_04</i> | +      | 7778     | 8731      | 317         | Beta-Xylosidase              | GHF43  | 35572.72 | 5.08 | <i>Bacteroides intestinalis</i>   | E=2e-102; I=184/316 (58%); P=228/316 (72%)        | YP_001297392.1 |
| <i>r_03_05</i> | +      | 8786     | 10405     | 539         | alpha-L-Arabinofuranosidase  | GHF43  | 59988.12 | 7.2  | <i>Bacteroides xylanisolvens</i>  | E=7e-170; I288/527 (54%=); P=378/527 (71%)        | ZP_06769240.1  |
| <i>r_05_02</i> | -      | 312      | 1949      | 546         | Glycosyl hydrolase family 5  | GHF5   | 61222.36 | 5.31 | Unidentified microorganism        | E=0.0; I=328/518 (63%); P=386/518 (74%)           | CAJ19140.1     |
| <i>r_06_02</i> | +      | 1560     | 3632      | 690         | Endo-1,4-beta-xylanase       | GHF5   | 78164.3  | 4.87 | <i>Prevotella ruminicola</i>      | E=5e-142; I=250/403 (62%); P=294/403 (72%)        | YP_003575492.1 |
| <i>r_07_01</i> | +      | 238      | 2718      | 827         | alfa-L-Rhamnosidase          | GHF78  | 94254.9  | 4.93 | <i>Clostridium stercorarium</i>   | E=7e-33; I=352/832 (42%); P=496/832 (59%)         | CAB53341.1     |
| <i>r_07_02</i> | +      | 3436     | 4176      | 260         | beta-Galactosidase           | GHF2   | 29543.47 | 8.69 | <i>Roseburia intestinalis</i>     | E=0.0; I=87/206 (42%); P=117/206 (56%)            | CBL10828.1     |
| <i>r_08_01</i> | +      | 258      | 3027      | 922         | alfa-L-Rhamnosidase          | GHF78  | 61801.6  | 5.62 | <i>Enterococcus casseliflavus</i> | E=1e-112; I=208/487 (42%); P=300/487 (61%)        | ZP_05654693.1  |
| <i>r_08_02</i> | +      | 3033     | 4069      | 346         | alpha/beta Hydrolase         | FAE2   | 40359.5  | 4.95 | <i>Lysinibacillus sphaericus</i>  | E=7e-42; I=117/306 (38%); P=153/306 (50%)         | YP_001698978.1 |
| <i>r_09_01</i> | -      | 6        | 1148      | 381         | Glycosyl hydrolase family 43 | GHF43  | 44516.1  | 4.93 | <i>Bryantella formatexigens</i>   | E=3e-115; I=204/383 (53%); P=272/383 (71%)        | ZP_05345324.1  |
| <i>r_09_02</i> | -      | 1157     | 2649      | 496         | Xylosidase/arabinosidase     | GHF43  | 54939.62 | 4.96 | <i>Bacteroides capillosus</i>     | E=4e-120; I=233/502 (46%); P=303/502 (60%)        | ZP_02035907.1  |
| <i>r_09_03</i> | -      | 2691     | 3263      | 189         | beta-Galactosidase           | GHF1   | 22244.69 | 4.83 | <i>Ruminococcus sp.</i>           | E=2e-54; I=108/192 (56%); P=131/192 (68%)         | CBL17177.1     |

\*The theoretical molecular weight (MW) and isoelectric point (pI) were calculated for the gene product using ExpPASy ProtParam online tool.

\*Sequence analysis revealed no signal peptide, thereby assuming an intracellular location of the proteins under investigation
