# Supplementary material for: Functional Metagenomics Unveils a Multifunctional Glycosyl Hydrolase from the Family 43 Catalysing the Breakdown of Plant Polymers in the Calf Rumen
Source: PubMed Central journal article supplement (PMC3382598; doi:10.1371/journal.pone.0038134), 2012-06-25
Supplement: pone.0038134.s012.pdf [file pone.0038134.s012.pdf]

**Table S4 Summary of the annotation features of the carbohydrate accessory enzymes identified in the hydrolase-encoding DNA fragments from the R library\*.**

| Gene name      | Strand | Left End | Right End | Length (AA) | Gene product name                         | MW (Da)   | pI   | Organism (best hit)              | Expected Value (E). Identities (I). Positives (P) | Top homolog    |
|----------------|--------|----------|-----------|-------------|-------------------------------------------|-----------|------|----------------------------------|---------------------------------------------------|----------------|
| <i>r_01_13</i> | +      | 14147    | 16546     | 799         | Sugar transporter                         | 89500.04  | 4.02 | <i>Bacillus mycoides</i>         | E=2e-16; I=111/449 (24%); P=198/449 (44%)         | ZP_04160063.1  |
| <i>r_01_22</i> | -      | 26345    | 28159     | 604         | Sugar transporter                         | 65605.7   | 5.14 | <i>Coprococcus comes</i>         | E=1e-86; I=173/302 (57%); P=212/302 (70%)         | ZP_06885281.1  |
| <i>r_01_25</i> | +      | 30423    | 31670     | 415         | Galactokinase                             | 44143.84  | 4.93 | <i>Clostridium sp.</i>           | E=7e-139; I=240/405 (59%); P=307/405 (75%)        | ZP_02073770.1  |
| <i>r_01_26</i> | +      | 31682    | 33166     | 494         | Galactose-1-phosphate uridylyltransferase | 55737.38  | 5.4  | <i>Clostridium sp.</i>           | E=0.0; I=315/498 (63%); P=372/498 (74%)           | ZP_02073769.1  |
| <i>r_01_27</i> | +      | 33237    | 34520     | 427         | sugar transporter                         | 45007.41  | 9.13 | <i>Oribacterium sp</i>           | E=3e-117; I=215/423 (50%); P=298/423 (70%)        | ZP_06598814.1  |
| <i>r_02_11</i> | +      | 9203     | 10285     | 360         | Glycosyltransferase                       | 41162.42  | 8.23 | <i>Prevotella ruminicola</i>     | E= 3e-169; I= 276/360 (76%); P= 320/360 (88%)     | YP_003574041.1 |
| <i>r_02_20</i> | -      | 17792    | 20368     | 858         | alpha-Glucan phosphorylase                | 99019.84  | 6    | <i>Prevotella ruminicola</i>     | E=0.0; I=766/856 (89%); P=819/856 (95%)           | YP_003574031.1 |
| <i>r_02_21</i> | -      | 20391    | 22082     | 563         | alpha-Glycosyltransferase                 | 64617.55  | 5.55 | <i>Prevotella ruminicola</i>     | E=0.0; I=466/576 (80%); P=503/576 (87%)           | YP_003574030.1 |
| <i>r_03_01</i> | +      | 1        | 3540      | 1148        | Melibiose (CBM)                           | 119432.86 | 4.48 | <i>Blastopirellula marina</i>    | E=3e-06; I=43/150 (28%); P=77/150 (51%)           | ZP_01089974.1  |
| <i>r_03_03</i> | +      | 6411     | 7748      | 445         | Sugar transporter                         | 47558.78  | 9.21 | <i>Bacteriodes xylanisolvens</i> | E=2e-147; I=267/486 (54%); P=335/486 (68%)        | CBK69517.1     |
| <i>r_03_06</i> | +      | 10683    | 12005     | 440         | Aldose 1-epimerase                        | 48897.69  | 9.46 | <i>Opitutus terrae</i>           | E=8e-96; I=172/357 (48%); P=228/357 (63%)         | YP_001818271.1 |

\*The theoretical molecular weight (MW) and isoelectric point (pI) were calculated for the gene product using ExPASy ProtParam online tool
