# Supplementary material for: Functional Metagenomics Unveils a Multifunctional Glycosyl Hydrolase from the Family 43 Catalysing the Breakdown of Plant Polymers in the Calf Rumen
Source: PubMed Central journal article supplement (PMC3382598; doi:10.1371/journal.pone.0038134), 2012-06-25
Supplement: pone.0038134.s013.pdf [file pone.0038134.s013.pdf]

**Table S5 Kinetic parameters of the glycosyl and feruloyl hydrolases that were subcloned, expressed, purified and characterised in this study.**

| Enzyme <sup>2</sup> | GHF                                    | Substrate                | $K_m$ (mM)      | $k_{cat}$ (s <sup>-1</sup> )            | $k_{cat}/K_m$ (s <sup>-1</sup> M <sup>-1</sup> ) |
|---------------------|----------------------------------------|--------------------------|-----------------|-----------------------------------------|--------------------------------------------------|
| R_01-21             | GHF36 ( $\alpha$ -galactosidase)       | <i>p</i> NP $\alpha$ Gal | 0.71 $\pm$ 0.10 | 538.0 $\pm$ 45.6                        | 7.6 $\cdot$ 10 <sup>5</sup>                      |
| R_02-02             | GHF51 ( $\alpha$ -arabinofuranosidase) | <i>p</i> NP $\alpha$ Af  | 0.69 $\pm$ 0.15 | 4.1 $\pm$ 0.2                           | 6.1 $\cdot$ 10 <sup>3</sup>                      |
|                     |                                        | <i>p</i> NP $\alpha$ Ap  | 6.40 $\pm$ 1.46 | 118.5 $\pm$ 17.2                        | 1.9 $\cdot$ 10 <sup>4</sup>                      |
| R_03-04             | GHF43 ( $\beta$ -xylosidase)           | <i>p</i> NP $\beta$ X    | 4.12 $\pm$ 0.56 | 127.4 $\pm$ 11.7                        | 3.1 $\cdot$ 10 <sup>4</sup>                      |
| R_03-05             | GHF43 ( $\alpha$ -arabinofuranosidase) | <i>p</i> NP $\alpha$ Af  | 4.90 $\pm$ 1.06 | 707.9 $\pm$ 15.5                        | 1.4 $\cdot$ 10 <sup>5</sup>                      |
| R_07-01             | GH78 ( $\alpha$ -rhamnosidase)         | <i>p</i> NP $\alpha$ R   | 3.58 $\pm$ 0.70 | (2.4 $\pm$ 0.2) $\cdot$ 10 <sup>3</sup> | 6.8 $\cdot$ 10 <sup>5</sup>                      |
| R_08-01             | GH78 ( $\alpha$ -rhamnosidase)         | <i>p</i> NP $\alpha$ R   | 3.15 $\pm$ 0.30 | (7.2 $\pm$ 0.2) $\cdot$ 10 <sup>4</sup> | 2.3 $\cdot$ 10 <sup>7</sup>                      |
| R_08-02             | FAE (feruloyl esterase)                | <i>p</i> NPA             | 2.73 $\pm$ 0.91 | 7.0 $\pm$ 0.3                           | 2.6 $\cdot$ 10 <sup>3</sup>                      |
|                     |                                        | <i>p</i> NPP             | 2.21 $\pm$ 0.44 | 54.6 $\pm$ 7.0                          | 2.5 $\cdot$ 10 <sup>4</sup>                      |
|                     |                                        | MF                       | 3.21 $\pm$ 0.39 | 28.7 $\pm$ 2.1                          | 8.9 $\cdot$ 10 <sup>3</sup>                      |
|                     |                                        | MpC                      | 3.50 $\pm$ 2.25 | 30.7 $\pm$ 5.1                          | 8.7 $\cdot$ 10 <sup>3</sup>                      |

Parameters were determined at the optimal pH and temperature, namely pH 5.5 and 45°C for R\_01-21, pH 5.5 and 45°C for R\_02-02, pH 6.0 and 35°C for R\_02-15, pH 5.5 and 50°C for R\_03-04 and R\_03-05, pH 8.5 and 55°C for R\_07-01, pH 5.5 and 50°C for R\_08-01, pH 8.0 and 50°C for R\_08-02, pH 5.5 and 45°C for R\_09-02.  $K_m$ ,  $k_{cat}$  and  $K_m$  values were obtained as described as follows: [E]<sub>0</sub>= 0-12 nM, [substrate] ranging from 0 to 100 mM.

\* Truncated genes that were not successfully cloned and purified as follows: R\_01-20 (GHF2  $\beta$ -galactosidase), R\_03-01 (CMB\_51), R\_05-01 (GHF5 endo- $\beta$ -1,4-glucanase), R\_06-02 (GHF5 endo- $\beta$ -1,4-glucanase), R\_07-02 (GHF2), R\_09-01 (GHF43) and R\_09-03 (GHF1  $\beta$ -galactosidase).
