# Supplementary material for: Functional Metagenomics Unveils a Multifunctional Glycosyl Hydrolase from the Family 43 Catalysing the Breakdown of Plant Polymers in the Calf Rumen
Source: PubMed Central journal article supplement (PMC3382598; doi:10.1371/journal.pone.0038134), 2012-06-25
Supplement: pone.0038134.s014.pdf [file pone.0038134.s014.pdf]

**Table S6 Vectors (A) and oligonucleotides (B) used in this work.**

**(A) Vectors**

| <b>Fosmid/plasmid</b>        | <b>Description</b>                                                                                                                                |
|------------------------------|---------------------------------------------------------------------------------------------------------------------------------------------------|
| <i>r_01</i>                  | pCCFOS vector with a 34609 bp of rumen derived DNA fragment containing the hydrolases genes <i>r_01-20</i> (2349 bp) and <i>r_01-21</i> (2394 bp) |
| <i>r_02</i>                  | pCCFOS vector with a 26383 bp of rumen derived DNA fragment containing the hydrolases genes <i>r_02-02</i> (1060 bp) and <i>r_02-15</i> (1503 bp) |
| <i>r_03</i>                  | pCCFOS vector with a 26679 bp of rumen derived DNA fragment containing the hydrolases genes <i>r_03-04</i> (951 bp) and <i>r_03-05</i> (1317 bp)  |
| <i>r_05</i>                  | pBK-CMV vector containing the 4699 bp of rumen derived metagenomic DNA harbouring the 1641 bp coding region of <i>r_05-01</i>                     |
| <i>r_06</i>                  | pBK-CMV vector containing the 5866 bp of rumen derived metagenomic DNA harbouring the 2073 bp coding region of <i>r_06-02</i>                     |
| <i>r_07</i>                  | pUC19 vector containing the 4215 bp of rumen metagenomic DNA harbouring the coding region of <i>r_07-01</i> (2484 bp) and <i>r_07-02</i> (831 bp) |
| <i>r_09</i>                  | pUC19 vector containing the 3305 bp of metagenomic DNA harbouring the 1491 bp coding region of <i>r_09-02</i>                                     |
| pGEM- <i>r_01-21</i>         | pGEM-T Easy vector containing the 2397 bp gene coding R_01-21 hydrolase                                                                           |
| pGEM- <i>r_02-02</i>         | pGEM-T Easy vector containing the 1593 bp gene coding R_02-02 hydrolase                                                                           |
| pGEM- <i>r_02-15</i>         | pGEM-T Easy vector containing the 1506 bp gene coding R_02-15 hydrolase                                                                           |
| pGEM- <i>r_03-4</i>          | pGEM-T Easy vector containing the 951 bp gene coding R_03-4 hydrolase                                                                             |
| pGEM- <i>r_03-5</i>          | pGEM-T Easy vector containing the 1317 bp gene coding R_03-5 hydrolase                                                                            |
| pGEM- <i>r_07-01</i>         | pGEM-T Easy vector containing the 2484 bp gene coding R_07-01 hydrolase                                                                           |
| pGEM- <i>r_08-01</i>         | pGEM-T Easy vector containing the 1668 bp gene coding R_08-01 hydrolase                                                                           |
| pGEM- <i>r_08-02</i>         | pGEM-T Easy vector containing the 1101 bp gene coding R_08-02 hydrolase                                                                           |
| pGEM- <i>r_09-02</i>         | pGEM-T Easy vector containing the 1491 bp gene coding R_09-02 hydrolase                                                                           |
| pET-41Ek/LIC- <i>r_01-21</i> | pET-41Ek/LIC vector containing the 2397 bp gene coding R_01-21 hydrolase                                                                          |
| pET-41Ek/LIC- <i>r_02-02</i> | pET-41Ek/LIC vector containing the 1593 bp gene coding R_02-02 hydrolase                                                                          |
| pET-41Ek/LIC- <i>r_02-15</i> | pET-41Ek/LIC vector containing the 1506 bp gene coding R_02-15 hydrolase                                                                          |
| pET-41Ek/LIC- <i>r_03-4</i>  | pET-41Ek/LIC vector containing the 951 bp gene coding R_03-4 hydrolase                                                                            |
| pET-41Ek/LIC- <i>r_03-5</i>  | pET-41Ek/LIC vector containing the 1317 bp gene coding R_03-5 hydrolase                                                                           |
| pET-41Ek/LIC- <i>r_07-01</i> | pET-41Ek/LIC vector containing the 2484 bp gene coding R_07-01 hydrolase                                                                          |
| pET-41Ek/LIC- <i>r_08-01</i> | pET-41Ek/LIC vector containing the 1668 bp gene coding R_08-01 hydrolase                                                                          |
| pET-41Ek/LIC- <i>r_08-02</i> | pET-41Ek/LIC vector containing the 1101 bp gene coding R_08-02 hydrolase                                                                          |
| pET-41Ek/LIC- <i>r_09-02</i> | pET-41Ek/LIC vector containing the 1491 bp gene coding R_09-02 hydrolase                                                                          |

**Table S6 (B) Primers**

| <b>Fosmid/plasmid</b> | <b>Oligonucleotides</b>                               |
|-----------------------|-------------------------------------------------------|
| <i>r_01-21_Fwd</i>    | 5'-gacgacgacaagATGATCACTGTTAAGGGGGATAAGACCC-3'        |
| <i>r_01-21_Rev</i>    | 5'-gaggagaagcccgTTACTTATCGATCTTCTCTATCGTGTATAACC-3'   |
| <i>r_01-20_Fwd</i>    | 5'-gacgacgacaagATGAGGATCGACATCAATAACGACTGGC-3'        |
| <i>r_01-20_Rev</i>    | 5'-gaggagaagcccgTTACGCCAGACGCACGGTGAAGTCCGCC-3'       |
| <i>r_02-15_Fwd</i>    | 5'-gacgacgacaagATGAAGAACTATTCATTACCGCAACG -3'         |
| <i>r_02-15_Rev</i>    | 5'-gaggagaagcccgTTATTTGATGTTTAATACGATTATCGATTTTGC -3' |
| <i>r_02-02_Fwd</i>    | 5'-gacgacgacaagATGGGCGTGAGTCATATCTGGTACACGGG -3'      |
| <i>r_02-02_Rev</i>    | 5'-gaggagaagcccgTTATGCTTTGAATTTTCAGAATTAACGCGCC -3'   |
| <i>r_03-04_Fwd</i>    | 5'-gacgacgacaagATGAACGGTGCCGGAACGCTCAAACCTC-3'        |
| <i>r_03-04_Rev</i>    | 5'-gaggagaagcccgTTATCGCACGATCACAACGAACGCGTCGCC-3'     |
| <i>r_03-05_Fwd</i>    | 5'-gacgacgacaagATGAAAACAGGGATGCTACTTTTCGCTCAC-3'      |
| <i>r_03-05_Rev</i>    | 5'-gaggagaagcccgTTACCGCAGAGAACCACGTGCGGTTGCGG-3'      |
| <i>r_07-01_Fwd</i>    | 5'-gacgacgacaagATGAAGCTGAACGATCTGCGCGTCTGC-3'         |
| <i>r_07-01_Rev</i>    | 5'-gaggagaagcccgTTATGCTTCCTCCTCCAGTGATAGCTGCC-3'      |
| <i>r_08-01_Fwd</i>    | 5'-gacgacgacaagATGAAACTGAAGCGCTGAAGATCAACGG-3'        |
| <i>r_08-01_Rev</i>    | 5'-gaggagaagcccgTTAAAGCTGTAGTGCCGCCTGGTGTCCATCC-3'    |
| <i>r_08-02_Fwd</i>    | 5'-gacgacgacaagATGCGACTGGACAGCAAGCTGCCCC-3'           |
| <i>r_08-02_Rev</i>    | 5'-gaggagaagcccgTTATCCGTTTCAGTTTTCCGTCAAATACGCCG-3'   |
| <i>r_09-02_Fwd</i>    | 5'-gacgacgacaagATGGAACAGGTTTTCAATCCCTATCTGCC-3'       |
| <i>r_09-02_Rev</i>    | 5'-gaggagaagcccgTTACTCTGCAAAAAACAGATTCTTTTCAGCTCC-3'  |
