# Supplementary material for: Functional Metagenomics Unveils a Multifunctional Glycosyl Hydrolase from the Family 43 Catalysing the Breakdown of Plant Polymers in the Calf Rumen
Source: PubMed Central journal article supplement (PMC3382598; doi:10.1371/journal.pone.0038134), 2012-06-25
Supplement: pone.0038134.s015.pdf [file pone.0038134.s015.pdf]

**Table S7 Biochemical information of GHF43 enzymes described in Figure 2. Data are based on bibliographic records that are specifically cited.**

| Uniprot/GenBank code                                                             | Source                            | Substrates tested                                                                                                                                                                                                                                                                                                                                                                                             | Reference                                                                                                                                                                                                                                                         |
|----------------------------------------------------------------------------------|-----------------------------------|---------------------------------------------------------------------------------------------------------------------------------------------------------------------------------------------------------------------------------------------------------------------------------------------------------------------------------------------------------------------------------------------------------------|-------------------------------------------------------------------------------------------------------------------------------------------------------------------------------------------------------------------------------------------------------------------|
| P07129<br>( $\beta$ -Xylosidase)                                                 | <i>Bacillus pumilus</i>           | Active towards pNP $\beta$ Xyl ( $V_m$ 1.23 $\pm$ 0.14 $\mu$ kat/mg; $K_m$ 3.9 $\pm$ 0.59 mM) and xylobiose ( $V_m$ 0.14 $\pm$ 0.011 $\mu$ kat/mg; $K_m$ 8.99 $\pm$ 1.19 mM)<br>No activity towards xylan (< 0.8 nkat/mg)                                                                                                                                                                                     | Xu WZ, Shima Y, Negoro S, Urabe I. (1991). Sequence and properties of beta-xylosidase from <i>Bacillus pumilus</i> IPO. Contradiction of the previous nucleotide sequence. <i>Eur. J Biochem</i> <b>202</b> : 1197-1203                                           |
| Q9Z477<br>( $\beta$ -Xylosidase)                                                 | <i>Bacillus pumilus</i>           | Active towards pNP $\beta$ Xyl (no activity value indicated)                                                                                                                                                                                                                                                                                                                                                  | La Grange DC, Pretorius IS, van Zyl WH. (1997). Cloning of the <i>Bacillus pumilus</i> beta-xylosidase gene (xynB) and its expression in <i>Saccharomyces cerevisiae</i> . <i>Appl. Microbiol. Biotechnol.</i> <b>47</b> : 262-266                                |
| P94489<br>( $\beta$ -Xylosidase)                                                 | <i>Bacillus subtilis</i>          | Active towards pNP $\beta$ Xyl (43.5 units per 1.4x10 <sup>9</sup> cellsm <sup>-1</sup> min <sup>-1</sup> ), xylan (0.27 units per 1.4x10 <sup>9</sup> cellsm <sup>-1</sup> min <sup>-1</sup> )                                                                                                                                                                                                               | Roncero MI. (1983). Genes controlling xylan utilization by <i>Bacillus subtilis</i> . <i>J Bacteriol.</i> <b>156</b> : 257-263                                                                                                                                    |
| O52575<br>( $\beta$ -Xylosidase/ $\alpha$ -Arabinosidase)<br>(Xyl > Ara)         | <i>Selenomonas ruminantum</i>     | Active towards pNP $\alpha$ Araf (1.8 U/mg), pNP $\beta$ Xyl (15.7 U/mg) and xylooligosaccharides (not given)<br>No activity towards xylan                                                                                                                                                                                                                                                                    | Whitehead TR, Cotta MA. (2001). Identification of a broad-specificity xylosidase/arabinosidase important for xylooligosaccharide fermentation by the ruminal anaerobe <i>Selenomonas ruminantum</i> GA192. <i>Curr. Microbiol.</i> <b>43</b> : 293-298            |
| Q09LX0<br>( $\beta$ -Xylosidase/ $\alpha$ -Arabinosidase)<br>(Xyl > Ara)         | <i>Geobacillus stercorophilus</i> | Active towards pNP $\beta$ Xyl ( $k_{cat}$ 57 s <sup>-1</sup> ; $K_m$ 17 mM) and pNP $\alpha$ Araf ( $k_{cat}$ 2.7 s <sup>-1</sup> ; $K_m$ 6 mM)<br>No activity towards pNP $\alpha$ Gal, pNP $\alpha$ Arap, pNP $\alpha$ Glu, pNP $\alpha$ Fuc, pNP $\alpha$ Rhamn and pNP $\beta$ Man ( $k_{cat}$ < 0.029 s <sup>-1</sup> )                                                                                 | Shallom D, Leon M, Bravman T, Ben-David A, Zaide G, et al. (2005). Biochemical characterization and identification of the catalytic residues of a family 43 beta-D-xylosidase from <i>Geobacillus stercorophilus</i> T-6. <i>Biochemistry</i> <b>44</b> : 387-397 |
| Q9K6P5<br>( $\beta$ -Xylosidase/ $\alpha$ -Arabinosidase)<br>(Xyl > Ara)         | <i>Bacillus halodurans</i>        | Active towards pNP $\beta$ Xyl ( $k_{cat}$ 12.09s <sup>-1</sup> ; $K_m$ 4.40 mM) and pNP $\alpha$ Araf ( $k_{cat}$ 2.11s <sup>-1</sup> ; $K_m$ 13.84 mM)                                                                                                                                                                                                                                                      | Smaali I, Remond C, O'Donohue MJ. (2006). Expression in <i>Escherichia coli</i> and characterization of beta-xylosidases GH39 and GH-43 from <i>Bacillus halodurans</i> C-125. <i>Appl. Microbiol. Biotechnol.</i> <b>73</b> : 582-590                            |
| A9Z9D1<br>( $\beta$ -Xylosidase)                                                 | <i>Vibrio</i> sp.                 | Active towards pNP $\beta$ Xyl ( $V_{max}$ 1.82 $\mu$ molmin <sup>-1</sup> mg <sup>-1</sup> ; $K_m$ 0.244 mM) and xylo-oligosaccharides (1,3) > (1,4) (not given)<br>No activity towards pNP $\alpha$ Xyl, pNP $\alpha$ Gal, pNP $\alpha$ Araf, pNP $\alpha$ Arap, pNP $\alpha$ Glu, pNP $\beta$ Glu, pNP $\alpha$ Fuc, pNP $\alpha$ Man, pNP $\beta$ Man, pNP $\beta$ Cel, pNP $\beta$ glucuronide and xylan | Umamoto Y, Onishi R, Araki T. (2008). Cloning of a novel gene encoding beta-1,3-xylosidase from a marine bacterium, <i>Vibrio</i> sp. strain XY-214, and characterization of the gene product. <i>Appl. Environ. Microbiol.</i> <b>74</b> : 305-308               |
| P45982<br>( $\alpha$ -Arabinosidase/ $\beta$ -Xylosidase/ $\alpha$ -Glucosidase) | <i>Butyrivibrio fibrisolvens</i>  | Active towards pNP $\beta$ Xyl (8.9 nmolmin <sup>-1</sup> mg <sup>-1</sup> ), pNP $\alpha$ Araf (15.5 nmolmin <sup>-1</sup> mg <sup>-1</sup> ), pNP $\alpha$ Arap (0.14 nmolmin <sup>-1</sup> mg <sup>-1</sup> ), pNP $\alpha$ Gal (0.17 nmolmin <sup>-1</sup> mg <sup>-1</sup> )                                                                                                                             | Utt EA, Eddy CK, Keshav KF, Ingram LO. (1991). Sequencing and expression of the <i>Butyrivibrio fibrisolvens</i> xylB gene encoding a novel bifunctional protein with beta-D-xylosidase and alpha-L-                                                              |

|                                                         |                                     |                                                                                                                                                                                                                                                                                                                                                                                                                                                                                                                            |                                                                                                                                                                                                                                                                                             |
|---------------------------------------------------------|-------------------------------------|----------------------------------------------------------------------------------------------------------------------------------------------------------------------------------------------------------------------------------------------------------------------------------------------------------------------------------------------------------------------------------------------------------------------------------------------------------------------------------------------------------------------------|---------------------------------------------------------------------------------------------------------------------------------------------------------------------------------------------------------------------------------------------------------------------------------------------|
|                                                         |                                     | <sup>1</sup> mg <sup>-1</sup> ), pNPαGlu (3.25 nmolmin <sup>-1</sup> mg <sup>-1</sup> ), pNPαMan (0.15 nmolmin <sup>-1</sup> mg <sup>-1</sup> ), pNPβMan (0.10 nmolmin <sup>-1</sup> mg <sup>-1</sup> ), pNPαFuc (0.19 nmolmin <sup>-1</sup> mg <sup>-1</sup> ), pNPβDFuc (0.22 nmolmin <sup>-1</sup> mg <sup>-1</sup> ), pNPβLFuc (0.42 nmolmin <sup>-1</sup> mg <sup>-1</sup> ), pNPαRhamn (0.28 nmolmin <sup>-1</sup> mg <sup>-1</sup> )                                                                                | arabinofuranosidase activities. <i>Appl. Environ. Microbiol.</i> <b>57</b> : 1227-1234                                                                                                                                                                                                      |
| A055D8<br>(α-Arabinosidase/β-Xylosidase)<br>(Ara > Xyl) | Uncultured bacterium                | Active towards pNPαAraf ( $k_{cat}$ 0.684s <sup>-1</sup> ; $K_m$ 0.25 mM), pNPβXyl ( $k_{cat}$ 0.132s <sup>-1</sup> ; $K_m$ 0.96mM) and arabinan (not given)<br>No activity towards pNPαArap, pNPβGlu, pNPβDFuc, pNPβGal, pNPβMan, xylobiose and xylan                                                                                                                                                                                                                                                                     | Wagschal K, Franqui-Espiet D, Lee CC, Kibblewhite-Accinelli RE, Robertson GH, Wong DW. (2007). Genetic and biochemical characterization of an α-L-arabinofuranosidase isolated from a compost starter mixture. <i>Enzyme and Microbial Technology</i> <b>40</b> : 747-753                   |
| B8QP77<br>(β-Xylosidase/α-Arabinosidase)<br>(Xyl > Ara) | Uncultured bacterium                | Active towards pNPαAraf ( $k_{cat}$ 0.120 s <sup>-1</sup> ; $K_m$ 0.072mM), pNPβXyl ( $k_{cat}$ 1.34 s <sup>-1</sup> ; $K_m$ 1.53 mM), xylobiose ( $k_{cat}$ 0.047 s <sup>-1</sup> ; $K_m$ 15.9mM), xylotriase ( $k_{cat}$ 0.044 s <sup>-1</sup> ; $K_m$ 10.4 mM), xylo-tetraose ( $k_{cat}$ 0.019 s <sup>-1</sup> ; $K_m$ 7.5 mM), arabinan, arabinobiose, arabinotriose and arabinoxylan<br>No activity towards pNPαXyl, pNPαArap, pNPβArap, pNPαGlu, pNPβGlu, pNPαLFuc, pNPβDFuc, pNPαGal, pNPβGal, pNPαMan and pNPβMan | Wagschal K, Heng C, Lee CC, Wong DW. (2009). Biochemical characterization of a novel dual-function arabinofuranosidase/xylosidase isolated from a compost starter mixture. <i>Appl. Microbiol. Biotechnol.</i> <b>81</b> : 855-863                                                          |
| Q76EC8<br>(β-Xylosidase)                                | <i>Clostridium stercorarium</i>     | Active towards pNPβXyl (10 U/mg; $V_{max}$ 15 μmolmin <sup>-1</sup> mg <sup>-1</sup> ; $K_m$ 6.3 mM) and xylan (0.05-0.1 U/mg)<br>No activity towards pNPαXyl, pNPαArap and pNPαLAraf                                                                                                                                                                                                                                                                                                                                      | Suryani, Kimura T, Sakka K, Ohmiya K. (2004). Sequencing and expression of the gene encoding the <i>Clostridium stercorarium</i> beta-xylosidase Xyl143B in <i>Escherichia coli</i> . <i>Biosci. Biotechnol. Biochem</i> <b>68</b> : 609-614                                                |
| A1A049<br>(α-Arabinosidase)                             | <i>Bifidobacterium adolescentis</i> | Active towards arabinoxylanoligosaccharides (arabinose release) (90.4 U/mg) and pNPαAraf (0.095 U/mg)<br>No activity towards xylan and arabinan                                                                                                                                                                                                                                                                                                                                                                            | van den Broek LA, Lloyd RM, Beldman G, Verdoes JC, McCleary BV, Voragen AG. (2005). Cloning and characterization of arabinoxylan arabinofuranohydrolase-D3 (AXHd3) from <i>Bifidobacterium adolescentis</i> DSM20083. <i>Appl. Microbiol. Biotechnol.</i> <b>67</b> : 641-647               |
| P45796<br>(α-Arabinosidase)                             | <i>Paenibacillus polymixa</i>       | Active towards wheat flour xylan, oat spelt xylan (arabinose release) (91-135 unitsmin <sup>-1</sup> mg <sup>-1</sup> ) and pNPαAraf (0.98 unitsmin <sup>-1</sup> mg <sup>-1</sup> )<br>No activity towards pNPβXyl, birchwood xylan, arabinan, arabinogalactan, xylo-oligosaccharides and arabino-oligosaccharides                                                                                                                                                                                                        | Morales P, Sendra JM, Perez-Gonzalez JA. (1995). Purification and characterization of an arabinofuranosidase from <i>Bacillus polymyxa</i> expressed in <i>Bacillus subtilis</i> . <i>Appl. Microbiol. Biotechnol.</i> <b>44</b> : 112-117                                                  |
| Q45071<br>(α-Arabinosidase)                             | <i>Bacillus subtilis</i>            | Active towards pNPαAraf (74 mU/mg), arabinooligosaccharides (3.2 mU/mg), arabinoxylan (1.8 mU/mg) (arabinose release), arabinan (< 0.01 mU/mg) and pNPβXyl (< 0.01                                                                                                                                                                                                                                                                                                                                                         | Bourgeois TM, Van C, V, Van CS, Courtin CM, Delcour JA, Robben J, Volckaert G. (2007). Recombinant expression and characterization of XynD from <i>Bacillus subtilis</i> subsp. <i>subtilis</i> ATCC 6051: a GH 43 arabinoxylan arabinofuranohydrolase. <i>Appl. Microbiol. Biotechnol.</i> |

|                                                             |                                   | mU/mg)                                                                                                                                                                                                                                                                                                                                                                                                                            | 75: 1309-1317                                                                                                                                                                                                                                                                                                                                   |
|-------------------------------------------------------------|-----------------------------------|-----------------------------------------------------------------------------------------------------------------------------------------------------------------------------------------------------------------------------------------------------------------------------------------------------------------------------------------------------------------------------------------------------------------------------------|-------------------------------------------------------------------------------------------------------------------------------------------------------------------------------------------------------------------------------------------------------------------------------------------------------------------------------------------------|
| B3PD60<br>( $\alpha$ -Arabinosidase)                        | <i>Cellvibrio japonicus</i>       | Active towards sugar beet arabinan (arabinose release) and pNP $\alpha$ LArarf<br>No activity towards linear arabinan, xylan, pectin, $\beta$ -glucan and pNP $\beta$ DXyl                                                                                                                                                                                                                                                        | Cartmell A, McKee LS, Pena MJ, Larsbrink J, Brumer H, et al. (2011). The structure and function of an arabinan-specific alpha-1,2-arabinofuranosidase identified from screening the activities of bacterial GH43 glycoside hydrolases. <i>J Biol. Chem.</i> <b>286</b> : 15483-15495                                                            |
| ADV16404<br>( $\alpha$ -Arabinosidase/ $\beta$ -Xylosidase) | <i>Paenibacillus woosongensis</i> | Active towards pNP $\beta$ Xyl (660 mU/mg; $V_{max}$ 1.4 $\mu$ molmin <sup>-1</sup> mg <sup>-1</sup> ; $K_m$ 1.1 mM), pNP $\alpha$ Araf (mU/mg; $V_{max}$ 3.1 $\mu$ molmin <sup>-1</sup> mg <sup>-1</sup> ; $K_m$ 8.5 mM), pNP $\alpha$ Arap (0.06 mU/mg), pNP $\beta$ Gal (0.65 mU/mg) and xylan (<0.03 mU/mg)<br>No activity towards pNP $\beta$ Glu, pNP $\beta$ Gal and pNP $\beta$ Man, pNP $\alpha$ Gal, , pNP $\alpha$ Glu | Kim YA, Yoon KH. (2010). Characterization of a <i>Paenibacillus woosongensis</i> beta-xylosidase/alpha-arabinofuranosidase produced by recombinant <i>Escherichia coli</i> . <i>J Microbiol. Biotechnol.</i> <b>20</b> : 1711-1716                                                                                                              |
| P48790<br>( $\alpha$ -Arabinosidase/ $\beta$ -Xylosidase)   | <i>Clostridium stercorarium</i>   | Active towards pNP $\beta$ Xyl ( $V_{max}$ 5.9 nmolmin <sup>-1</sup> $\mu$ g <sup>-1</sup> ; $K_m$ 2.5 mM), pNP $\alpha$ Araf ( $V_{max}$ 16.7 nmolmin <sup>-1</sup> $\mu$ g <sup>-1</sup> ; $K_m$ 17.6 mM) and xylobiose (not given)<br>No activity towards pNP $\beta$ Glu, pNP $\beta$ Glu and pNP $\beta$ Man                                                                                                                 | Sakka K, Yoshikawa K, Kojima Y, Karita S, Ohmiya K, Shimada K. (1993). Nucleotide sequence of the <i>Clostridium stercorarium</i> xylA gene encoding a bifunctional protein with beta-D-xylosidase and alpha-L-arabinofuranosidase activities, and properties of the translated product. <i>Biosci. Biotechnol. Biochem</i> <b>57</b> : 268-272 |
| D8VNC7<br>( $\beta$ -Galactosidase)                         | Uncultured bacterium              | Active towards pNP $\beta$ Gal ( $k_{cat}$ 1780 s <sup>-1</sup> ; $K_m$ 0.19 mM), pNP $\alpha$ Arap ( $k_{cat}$ 1800 s <sup>-1</sup> ; $K_m$ 13.1 mM), pNP $\alpha$ Araf ( $k_{cat}$ 1950 s <sup>-1</sup> ; $K_m$ 13.1 mM) and pNP $\beta$ Xyl ( $k_{cat}$ 2800 s <sup>-1</sup> ; $K_m$ 22.8 mM)                                                                                                                                  | Beloqui A, Nechitaylo TY, Lopez-Cortes N, Ghazi A, Guazzaroni ME, et al. (2010). Diversity of glycosyl hydrolases from cellulose-depleting communities enriched from casts of two earthworm species. <i>Appl. Environ. Microbiol.</i> <b>76</b> : 5934-5946                                                                                     |
| P48791<br>( $\beta$ -Xylosidase/ $\alpha$ -Arabinosidase)   | <i>Prevotella bryantii</i>        | Active towards pNP $\beta$ Xyl (101 nmolmin <sup>-1</sup> mg <sup>-1</sup> ), pNP $\alpha$ Ara (89 nmolmin <sup>-1</sup> mg <sup>-1</sup> ), xylan (22-540 nmolmin <sup>-1</sup> mg <sup>-1</sup> ), xylobiose (not given) and xylopentaose (not given)                                                                                                                                                                           | Gasparic A, Martin J, Daniel AS, Flint HJ. (1995). A xylan hydrolase gene cluster in <i>Prevotella ruminicola</i> B(1)4: sequence relationships, synergistic interactions, and oxygen sensitivity of a novel enzyme with exoxylanase and beta-(1,4)-xylosidase activities. <i>Appl. Environ. Microbiol.</i> <b>61</b> : 2958-2964               |
| B3FRL6<br>( $\alpha$ -Arabinosidase)                        | <i>Bacillus subtilis</i>          | Active towards linear $\alpha$ -1,5-L-arabinan (73 U/mg), branched sugar beet arabinan (51 U/mg) and pectin (10 U/mg)<br>No activity towards larchwood arabinogalactan, arabinoxylan and pNP $\alpha$ Araf                                                                                                                                                                                                                        | Inacio JM, de Sa-Nogueira I. (2008). Characterization of abn2 (yxiA), encoding a <i>Bacillus subtilis</i> GH43 arabinanase, Abn2, and its role in arabino-polysaccharide degradation. <i>J Bacteriol.</i> <b>190</b> : 4272-4280                                                                                                                |
| D2XML7<br>( $\alpha$ -Arabinosidase)                        | Uncultured bacterium              | Active towards CM-arabinan, debranched arabinan, linear arabinan, sugar beet arabinan and arabinooligosaccharides (DP>5)<br>No activity towards arabinoxylan and pNP $\alpha$ Araf                                                                                                                                                                                                                                                | Wong DW, Chan VJ, McCormack AA. (2009). Functional cloning and expression of a novel endo-alpha-1,5-L-arabinanase from a metagenomic library. <i>Protein Pept. Lett.</i> <b>16</b> : 1435-1441                                                                                                                                                  |
| BAC68753<br>( $\alpha$ -Arabinosidase)                      | <i>Streptomyces avermiles</i>     | Active towards pNP $\alpha$ Araf, debranched arabinan and $\alpha$ (1,5)arabinofuranooligosaccharides (values not given)                                                                                                                                                                                                                                                                                                          | Ichinose H, Yoshida M, Fujimoto Z, Kaneko S. (2008). Characterization of a modular enzyme of exo-1,5-alpha-L-arabinofuranosidase and arabinan binding module from <i>Streptomyces</i>                                                                                                                                                           |

Eliminado: No activity tested towards pNP $\beta$ Xyl

Eliminado: No activity tested towards pNP $\beta$ Xyl

|                                      |                                        |                                                                                                                                                                                                                                                                                                                                                                                                |                                                                                                                                                                                                                                                                                                                                                                                                                                                             |
|--------------------------------------|----------------------------------------|------------------------------------------------------------------------------------------------------------------------------------------------------------------------------------------------------------------------------------------------------------------------------------------------------------------------------------------------------------------------------------------------|-------------------------------------------------------------------------------------------------------------------------------------------------------------------------------------------------------------------------------------------------------------------------------------------------------------------------------------------------------------------------------------------------------------------------------------------------------------|
|                                      |                                        | No activity towards pNP $\alpha$ Arap, pNP $\beta$ Xyl, pNP $\beta$ Gal, xylan, arabinoxylan and arabinan                                                                                                                                                                                                                                                                                      | <i>avermitilis</i> NBRC14893. <i>Appl. Microbiol. Biotechnol.</i> <b>80</b> : 399-408<br>Fujimoto Z, Ichinose H, Maehara T, Honda M, Kitaoka M, Kaneko S. (2010). Crystal structure of an Exo-1,5- $\alpha$ -L-arabinofuranosidase from <i>Streptomyces avermitilis</i> provides insights into the mechanism of substrate discrimination between exo- and endo-type enzymes in glycoside hydrolase family 43. <i>J Biol. Chem.</i> <b>285</b> : 34134-34143 |
| P82594<br>( $\alpha$ -Arabinosidase) | <i>Streptomyces chartreusis</i>        | Active towards pNP $\alpha$ Araf (not given), $\alpha$ (1,5)linked arabinan (4.3-35.7% activity), arabinoxylan (2.6-5.2% activity) and arabinogalactan (2.2-2.4% activity) (arabinose release)<br>No activity towards pNP $\alpha$ Arap, pNP $\beta$ Xyl, pNP $\beta$ Gal, gum Arabic and arabinoxylooligosaccharides                                                                          | Matsuo N, Kaneko S, Kuno A, Kobayashi H, Kusakabe I. (2000). Purification, characterization and gene cloning of two alpha-L-arabinofuranosidases from <i>Streptomyces chartreusis</i> GS901. <i>Biochem J</i> <b>346</b> : 9-15                                                                                                                                                                                                                             |
| P94522<br>( $\alpha$ -Arabinosidase) | <i>Bacillus subtilis</i>               | Active towards linear $\alpha$ (1,5)linked arabinan and sugar beet arabinan (arabinose release)<br>No activity towards arabinogalactan, arabinoxylan, pNP $\alpha$ Araf                                                                                                                                                                                                                        | Leal TF, de Sa-Nogueira I. (2004). Purification, characterization and functional analysis of an endo-arabinanase (AbnA) from <i>Bacillus subtilis</i> . <i>FEMS Microbiol. Lett.</i> <b>241</b> : 41-48                                                                                                                                                                                                                                                     |
| B3EYM8<br>( $\alpha$ -Arabinosidase) | <i>Geobacillus stercorophilus</i>      | Active towards debranched arabinan, arabinooligosaccharides (DP 2-8) (data not given)<br>No activity towards pNP $\alpha$ Araf, pNP $\alpha$ Arap and pNP $\beta$ Xyl                                                                                                                                                                                                                          | Alhassid A, Ben-David A, Tabachnikov O, Libster D, Naveh E, et al. (2009). Crystal structure of an inverting GH 43 1,5-alpha-L-arabinanase from <i>Geobacillus stercorophilus</i> complexed with its substrate. <i>Biochem J</i> <b>422</b> : 73-82                                                                                                                                                                                                         |
| Q93HT9<br>( $\alpha$ -Arabinosidase) | <i>Geobacillus thermodenitrificans</i> | Active towards debranched arabinan (445 U/mg)                                                                                                                                                                                                                                                                                                                                                  | Takao M, Yamaguchi A, Yoshikawa K, Terashita T, Sakai T. (2002). Molecular cloning of the gene encoding thermostable endo-1,5-alpha-L-arabinase of <i>Bacillus thermodenitrificans</i> TS-3 and its expression in <i>Bacillus subtilis</i> . <i>Biosci. Biotechnol. Biochem</i> <b>66</b> : 430-433                                                                                                                                                         |
| B3PKP8<br>( $\alpha$ -Arabinosidase) | <i>Cellvibrio japonicus</i>            | Active towards linear arabinan ( $k_{cat}$ 109 s $^{-1}$ ; $K_m$ 3.75 mg/ml), arabinooligosaccharides (arabinotriose release; from 200-2174 units (relative activity) from arabinotetraose to arabinooctaose)<br>No activity towards branched sugar beet arabinan, cellulose, xylan, galactan, mannan, pNP $\alpha$ Araf, pNP $\alpha$ Arap, pNP $\beta$ Xyl and 2,4-dinitrophenyl xylobioside | McKie VA, Black GW, Millward-Sadler SJ, Hazlewood GP, Laurie JI, Gilbert HJ. (1997). Arabinanase A from <i>Pseudomonas fluorescens</i> subsp. <i>cellulosa</i> exhibits both an endo- and an exo- mode of action. <i>Biochem J</i> <b>323</b> : 547-555                                                                                                                                                                                                     |
| D2XML8<br>( $\alpha$ -Arabinosidase) | Uncultured bacterium                   | Active towards linear CM-arabinan (43.2 $\mu$ molmin $^{-1}$ mg $^{-1}$ ; $V_{max}$ 0.86 mgml $^{-1}$ min $^{-1}$ ; $K_m$ 6.2 mg/ml), debranched arabinan (34.9 $\mu$ molmin $^{-1}$ mg $^{-1}$ ), linear arabinan (23.2 $\mu$ molmin $^{-1}$ mg $^{-1}$ ) and arabinooligosaccharides (not given)(arabinose release)                                                                          | Wong DW, Chan VJ, Batt SB. (2008). Cloning and characterization of a novel exo-alpha-1,5-L-arabinanase gene and the enzyme. <i>Appl. Microbiol. Biotechnol.</i> <b>79</b> : 941-949                                                                                                                                                                                                                                                                         |

|  |                                                                                     |  |
|--|-------------------------------------------------------------------------------------|--|
|  | No activity towards sugar beet arabinan, arabinoxylan and <i>p</i> NP $\alpha$ Araf |  |
|--|-------------------------------------------------------------------------------------|--|

Abbreviations as follows: *p*NP $\beta$ Xyl: *p*-nitrophenyl- $\beta$ -D-xylopyranoside; *p*NP $\alpha$ Araf: *p*-nitrophenyl- $\alpha$ -L-arabinofuranoside; *p*NP $\alpha$ Gal: *p*-nitrophenyl- $\alpha$ -D-galactoside; *p*NP $\beta$ Gal: *p*-nitrophenyl- $\beta$ -D-galactoside; *p*NP $\alpha$ Arap: *p*-nitrophenyl- $\alpha$ -L-arabinopyranoside; *p*NP $\alpha$ Glu: *p*-nitrophenyl- $\alpha$ -D-glucoside; *p*NP $\alpha$ Fuc: *p*-nitrophenyl- $\alpha$ -L-fucoside; *p*NP $\alpha$ Rhamn: *p*-nitrophenyl- $\alpha$ -L-rhamnoside; *p*NP $\beta$ Man: *p*-nitrophenyl- $\beta$ -D-mannoside; *p*NP $\alpha$ Xyl: *p*-nitrophenyl- $\alpha$ -D-xylopyranoside; *p*NP $\beta$ Glu: *p*-nitrophenyl- $\beta$ -D-glucoside; *p*NP $\alpha$ Man: *p*-nitrophenyl- $\alpha$ -D-mannoside; *p*NP $\beta$ Cel: *p*-nitrophenyl- $\beta$ -D-cellobioside; *p*NP $\beta$ glucuronide: *p*-nitrophenyl- $\beta$ -D-glucuronide; *p*NP $\beta$ DFuc: *p*-nitrophenyl- $\beta$ -D-fucoside; *p*NP $\beta$ LFuc: *p*-nitrophenyl- $\beta$ -L-fucoside; CM-arabinan: carboxymethyl arabinan.
